1 **TITLE:**

2 Hybrid local and distributed coding in PMd/M1 provides separation and interaction of bilateral arm  
3 signals

4

5 **AUTHORS:**

6 Tanner C. Dixon<sup>1</sup>, Christina M. Merrick<sup>4</sup>, Joni D. Wallis<sup>1,2,4</sup>, Richard B. Ivry<sup>1,2,4</sup>, Jose M. Carmena<sup>1,2,3</sup>

7

8 **AFFILIATIONS:**

9 1) UC Berkeley – UCSF Graduate Program in Bioengineering

10 2) Helen Wills Neuroscience Institute, University of California-Berkeley, Berkeley, CA 94720, USA

11 3) Department of Electrical Engineering and Computer Sciences, University of California-Berkeley,  
12 Berkeley, CA, 94720, USA

13 4) Department of Psychology, University of California-Berkeley, Berkeley, CA 94720, USA

14

15 **CONTACT:**

16 [tcd44@berkeley.edu](mailto:tcd44@berkeley.edu); [jcarmena@berkeley.edu](mailto:jcarmena@berkeley.edu)

17

18 ABSTRACT:

19 Pronounced activity is observed in both hemispheres of the motor cortex during preparation and  
20 execution of unimanual movements. The organizational principles of bi-hemispheric signals and the  
21 functions they serve throughout motor planning remain unclear. Using an instructed-delay reaching task  
22 in monkeys, we identified two components in population responses spanning PMd and M1. A 'localized'  
23 component, which confined activity within arm-specific sub-populations, emerged in PMd during  
24 preparation. It was most prominent following movement when M1 became strongly engaged, and  
25 principally involved the contralateral hemisphere. In contrast to recent reports, these localized signals  
26 solely accounted for divergence of arm-specific neural subspaces. The other 'distributed' component  
27 mixed signals for each arm within units, and the subspace containing it did not discriminate between  
28 arms at any stage. The statistics of the population response suggest two functional layers of the cortical  
29 network: one spanning hemispheres supporting preparatory and ongoing processes, and another  
30 specifying unilateral output.

31

32

## 33 INTRODUCTION

34

35 In the primate cortex, direct control of arm movement is primarily mediated by contralateral descending  
36 projections (Lawrence and Kuypers, 1968; Brinkman and Kuypers, 1973; Soteropoulos et al., 2011).  
37 However, numerous studies have observed activity changes in the motor cortex during movements of  
38 the ipsilateral arm (Matsunami and Hamada, 1981; Hoshi and Tanji, 2002; Carmena et al., 2003; Cisek  
39 and Kalaska, 2003; Ganguly et al., 2009; Ames and Churchland, 2019; Heming et al., 2019) and hand  
40 (Tanji et al., 1988; Verstynen et al., 2005; Diedrichsen et al., 2013). The functional role of this ipsilateral  
41 activity has been the subject of considerable debate, with hypotheses ranging from a role in postural  
42 support, bimanual coordination, or an extrapyramidal control signal for unimanual movements.

43 Neurons in the primate dorsal premotor cortex (PMd) play a critical role in motor preparation (Weinrich  
44 et al., 1984; Shen and Alexander, 1997; Hoshi and Tanji, 2002; Cisek and Kalaska, 2003). Interestingly,  
45 their response properties and degree of laterality appear to change across the course of preparation.  
46 For example, within PMd, individual units exhibit a transition from effector-independent to effector-  
47 dependent encoding between preparatory and execution phases of reaching. In contrast, primary motor  
48 (M1) units primarily become active during movement itself and show a pronounced contralateral bias  
49 (Cisek and Kalaska, 2003). This suggests a transition from abstract planning to explicit specification of  
50 motor output parameters in the signals of individual neurons. A similar transition has been shown in the  
51 activation of different cell-types from mouse premotor areas: In a directed licking task, neurons with  
52 intracortical projections displayed bilateral selectivity and dominated the population response early  
53 during planning, while neurons with descending output that drove movement were contralaterally  
54 biased and only became active closer to the time of movement onset (Li et al., 2015). These studies  
55 support the idea that pre- and primary motor areas may contain both a component for performing  
56 abstract computations, and an output component that is lateralized, reflecting precise details of the  
57 movement.

58 The classic perspective outlined above has been revisited in studies that focus on population-level  
59 analysis, considering instead how control might be reflected in the way the network coordinates activity.  
60 Low-dimensional representations of large-scale neural recordings can be used to characterize these  
61 patterns, revealing changes in the covariance structure across behavioral settings that are not evident  
62 when looking at single neurons in isolation (Cunningham and Yu, 2014). Ostensibly, these changes  
63 reflect reorganization of the population as it engages in different computational processes. When used  
64 to describe the changes between preparation and execution, pre-movement activity has been shown to  
65 evolve within an “output-null” subspace towards an optimal initial population state (Churchland et al.,  
66 2010; Kaufman et al., 2014; Elsayed et al., 2016). This initial state is advantageously positioned for  
67 engaging the internal dynamics of the network to produce patterned output for driving movement  
68 (Churchland et al., 2012; Shenoy et al., 2013; Sussillo et al., 2015). The bilateral, effector-independent  
69 activity observed in single neurons may support these preparatory and dynamic properties at the  
70 population level (Li et al., 2016).

71 While a bilateral network may support effector-independent functions, one would expect some form of  
72 effector-specific signaling as unimanual movements are prepared. There are two fundamental ways that  
73 population activity could specify the selected arm across preparation and movement. (1) Signals may  
74 localize within unique sub-populations for each arm (i.e., within hemispheres, brain areas, or cell types).

75 (2) Signals may be distributed across the same units yet maintain unique covariance structure that  
76 separates along arm-specific neural dimensions. Importantly, either of these architectures provides a  
77 way for downstream targets to discriminate signals and also yields the mathematical result of divergent  
78 subspaces. Arm-specific subspaces have been observed in the motor cortex during rhythmic movements  
79 (Ames and Churchland, 2019) and in response to joint perturbations (Heming et al., 2019). These studies  
80 suggest that the same neurons are involved during movement of either arm, and that separation of arm-  
81 specific signals is an emergent property of the population. However, past work in single-unit and cell-  
82 type specific physiology suggests that at least a portion of population activity is lateralized, particularly  
83 upon movement onset (Cisek and Kalaska, 2003; Li et al., 2015). This may suggest a simpler explanation  
84 for the presence of arm-specific subspaces, where separation of arm signals is a trivial result of strong  
85 localized encoding, and signals that are shared within units represent the parallel operation of distinct  
86 effector-independent processes.

87 In the present study, we investigated the extent to which population signals are localized within arm-  
88 specific sub-populations as movements are prepared and executed. Furthermore, we characterized the  
89 dependence of subspace separation on this signal localization at each stage, and tested whether signals  
90 that were mixed within units represented a shared subspace for the two arms or whether they  
91 contributed to subspace divergence.

92 We recorded large populations of single-units in PMd and M1 bilaterally while monkeys performed an  
93 instructed-delay unimanual reaching task. During preparation, activity began to localize within arm-  
94 specific sub-populations located primarily within contralateral PMd. This occurred despite many of the  
95 units being arm-neutral, as there was a strong tendency for arm-dedicated units to be more highly  
96 modulated. Following movement, M1 became more prominently involved and a larger proportion of the  
97 modulation in the population became localized. As a result, subspaces corresponding to the two arms  
98 diverged across the trial. We found no evidence that subspace separation was an emergent property of  
99 population-level analysis; rather, it reflected localized variance. However, we did observe behaviorally  
100 specific information that was shared at the level of single-units. The subspace in which this information  
101 was contained did not segregate signals for the two arms. Taken together, the results point to two  
102 primary components in the population response: (1) A localized component that develops across  
103 preparation, reaches a maximum during movement, and mirrors the lateralized anatomy of corticospinal  
104 output with its contralateral bias. (2) A distributed component representing a bilateral network that may  
105 support preparation and reflect internal dynamics of the evolving population state.

106

## 107 **RESULTS**

### 108 Behavior

109 Two macaque monkeys were trained to perform an instructed-delay reaching task in 3-D space (Figure  
110 1A). Reaching movements were freely performed in an open area while kinematics were recorded using  
111 optical motion tracking. Visual feedback of endpoint position and task cues were provided through a  
112 virtual 3-D display. Each trial had three phases (Figure 1B). For the Rest phase, the monkey placed both  
113 hands in start targets positioned near the torso and remained still for 500 ms. For the Instruct phase, an  
114 instructional cue appeared at one of six target locations. The color of the cue specified the required  
115 hand for the forthcoming trial. The monkey was required to keep both hands in the rest positions while  
116 the cue remained visible for a variable interval (500 – 1500 ms). The Move phase was initiated when the

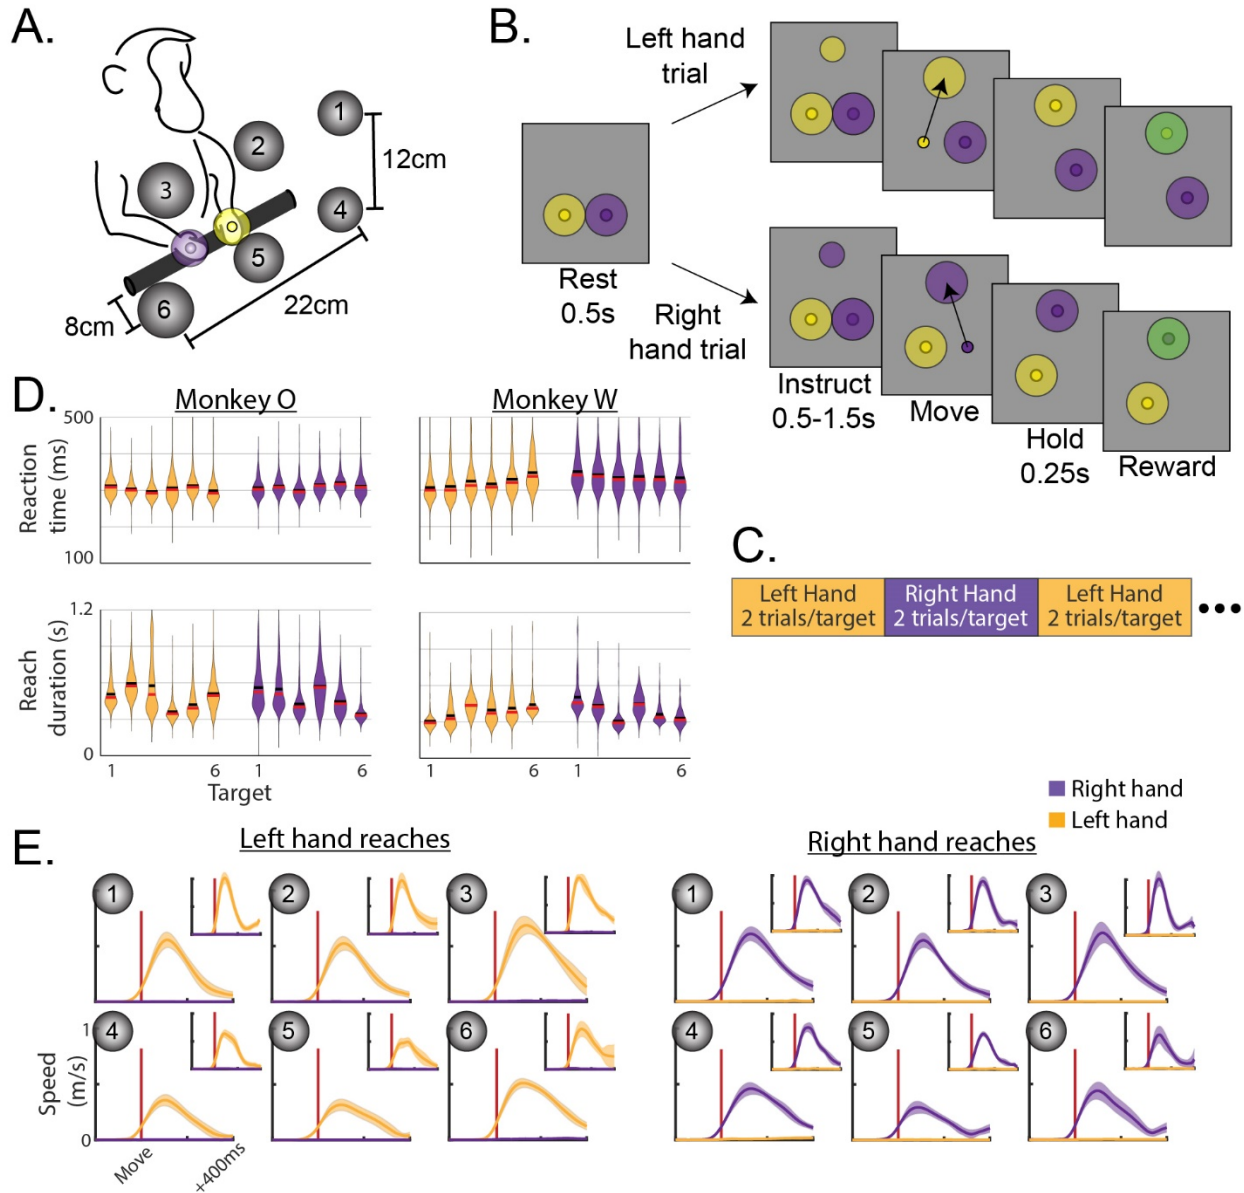

117

118 **Figure 1. Behavior.**

119 (A) Monkeys reached to one of six virtual targets, indicated by grey spheres in the cartoon. During the  
 120 task these would be invisible until one appeared to instruct the reach. (B) Trials consisted of 3 phases.  
 121 Each trial was initiated by placing both hands in start targets and remaining still for 500ms ('Rest'  
 122 phase). A small target then appeared at the location of the future reach in a color that indicated which  
 123 hand to use. The monkey remained still during cue presentation for 0.5-1.5s ('Instruct' phase). The start  
 124 target for the reaching hand then disappeared while the reach target enlarged to cue movement  
 125 ('Move' phase). (C) Hand assignments followed a blocked schedule. (D) Distributions of reaction times  
 126 (top row) and reach durations (bottom row) for each monkey, hand, and target. Left hand reaches in  
 127 yellow, right in purple. Horizontal black bars show means, red bars show medians. (E) Speed profiles  
 128 during left- or right-hand trials. Both reaching and stationary hands are plotted in each, although  
 129 stationary speeds are near 0 and hardly visible. Vertical red lines indicate threshold crossing to mark  
 130 movement onset. Monkey O main, monkey W inset. Mean +/- standard deviation.

131 start position marker for the reaching hand disappeared and the cue at the target location increased in  
132 size, which signaled the animal to reach. The monkey received a juice reward if it accurately reached the  
133 target and maintained the final position for 250 ms, while keeping the non-cued hand at its start  
134 position for the duration of the trial. 300ms representative windows from each phase were used in data  
135 analysis. Trials were blocked for each arm, alternating 2 trials per target for the left arm, then 2 trials per  
136 target for the right (Figure 1C).

137 Average success rates were above 95% for both hands in both monkeys. Overall, reaction times  
138 averaged 308 ms for monkey O and 333 ms for monkey W. Distributions of reaction times for each  
139 hand/target combination are displayed in Figure 1D, which were fairly consistent across the workspace.  
140 Reach biomechanics varied across the workspace, resulting in slightly different reach durations across  
141 targets (Figure 1D). In terms of kinematics, the initial feed-forward portions of reaches were smooth and  
142 stereotyped (Figure 1E). There was a very slight but significant increase in the speed of the non-reaching  
143 hand between Rest (mean – monkey O: 1.1 mm/s; monkey W: 2.9 mm/s) and Move (mean – monkey O:  
144 3.6 mm/s; monkey W: 7.6 mm/s) phases of the task (permutation test – monkey O:  $p=1.0e-4$ ; monkey  
145 W:  $p=1.0e-4$ ). We note that the task was designed to mimic natural reaching without the use of physical  
146 restraints. As such, we assume the small movements in the non-reaching arm are part of the normal  
147 behavioral repertoire occurring during natural unimanual reaching. Nonetheless, we will address any  
148 reasonable impacts these small movements may have in our neural analyses.

149

#### 150 Arm-dedicated units emerge across task phases while the majority remain arm-neutral

151 We recorded 433 and 113 single-units in the caudal aspect of dorsal premotor cortex (PMd) in monkeys  
152 O and W, respectively, and 331 and 289 single-units in primary motor cortex (M1) (Figure 2). Since both  
153 arms were used in the behavior, we can evaluate the ipsi- and contralateral response in each unit. Units  
154 were pooled across hemispheres in the analysis, with ‘Contralateral’ summaries reflecting the collection  
155 of responses during trials performed with the contralateral arm, and vice-versa for trials performed with  
156 the ipsilateral arm. PMd and M1 units were analyzed separately. Firing rates were soft-normalized using  
157 the Rest phase mean and standard deviation, and modulation strength is expressed as the mean  
158 squared value of these standard scores within the window of interest.

159 We first analyzed single units to determine the degree of modulation during the Instruct and Move  
160 phases of the task (Figure 3). Following instruction, many units in both PMd and M1 became significantly  
161 modulated for movements of one or both arms (Table S1). Units in PMd were, on average, more  
162 strongly modulated during the Instruct period than those in M1 (Figure 4A; permutation test – monkey  
163 O:  $p=0.012$ ; monkey W:  $p=3.2e-3$ ). This relationship reversed following movement, with average  
164 modulation in M1 becoming stronger than PMd (Figure 4A; permutation test – monkey O:  $p=2.6e-3$ ;  
165 monkey W:  $p=0.012$ ). These results are in line with the view that PMd plays a privileged role in motor  
166 preparation. The distributions of modulation values were heavy-tailed and contained some notably  
167 extreme values; however, we chose not to apply any outlier criteria. Controls are performed later in our  
168 population-level analyses to ensure that results are representative of trends across the entire  
169 population rather than a few extreme units.

170 We next considered the laterality of each unit by quantifying the relative modulation observed during  
171 ipsi- and contralateral trials. We expressed each unit’s arm preference on a scale from -1 to 1, with 1  
172 indicating exclusive contralateral modulation and -1 indicating exclusive ipsilateral modulation (Figure

173 4B). Although the cue for the forthcoming trial had yet to be presented during the Rest phase, arm  
174 selection could be implied from the blocked task structure (Figure 1C). However, except for a very small  
175 effect in PMd of monkey O (one-sample t-test –  $\mu_{\text{Rest}}=0.06$ ,  $p=9.7e-5$ ), there was no significant  
176 contralateral bias observed during the Rest phase in either brain area for both monkeys. Despite the lack  
177 of contralateral bias, both monkeys entered arm-specific population states during the Rest phase, which  
178 was more pronounced in PMd populations (mean difference between left and right arm firing rates –  
179 monkey O PMd: 1.85Hz, M1: 1.64Hz; monkey W PMd: 1.33Hz, M1: 0.98Hz; Figure 4C). For trials in which  
180 the same hand was repeated from the previous trial only, it was possible to classify the hand for the  
181 forthcoming movement from the population activity (Figure S1).

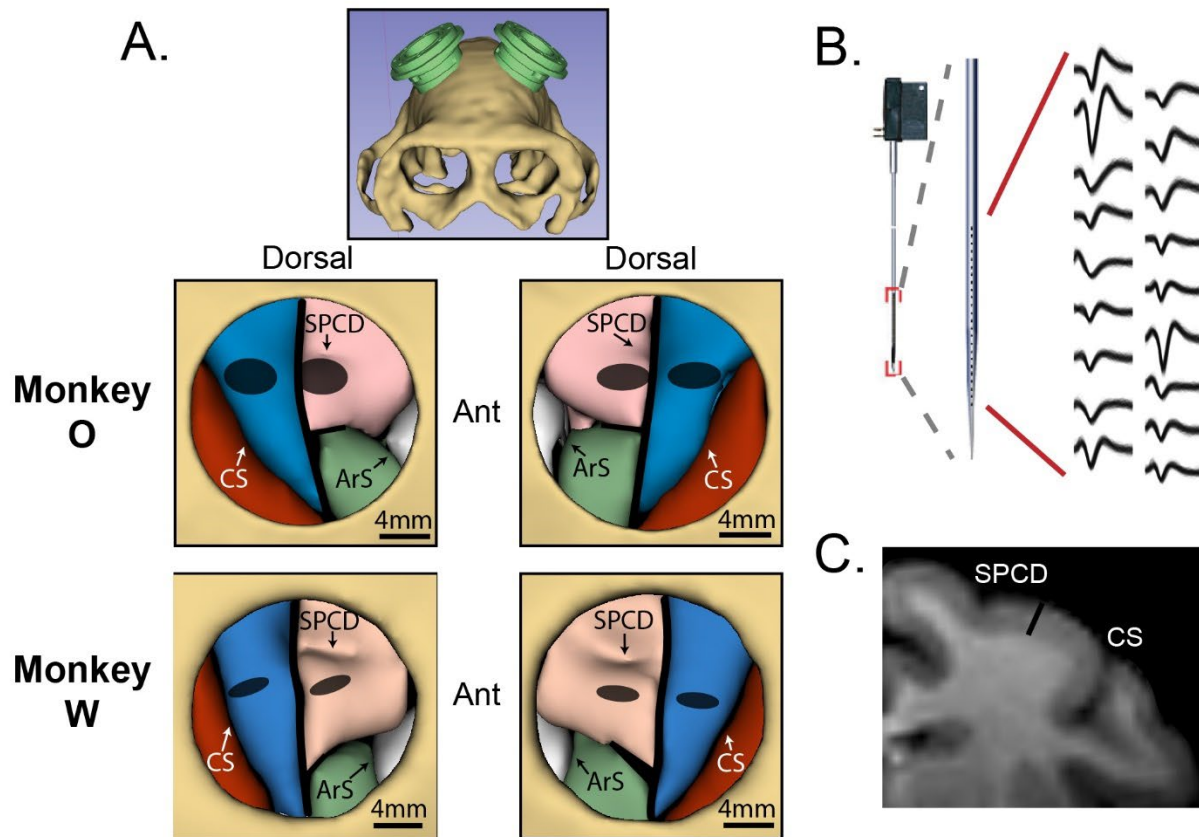

182

### 183 **Figure 2. Neural recordings.**

184 (A) MRI-based volume renderings of the skull and target brain regions. Top panel shows the  
185 arrangement of the two chambers. Two bottom rows show segmented brain regions within the cranial  
186 window of each chamber, for each monkey. Region boundaries were assigned based on Paxinos et al.,  
187 2009. Red - somatosensory cortex; blue - primary motor cortex (M1); pink - dorsal premotor cortex  
188 (PMd); green - ventral premotor cortex; white - frontal eye field. CS - central sulcus; SPCD - superior pre-  
189 central dimple; ArS - arcuate sulcus. Grey ellipses indicate regions sampled by recordings. (B)  
190 Interlaminar recordings were obtained using V- and S- probes (Plexon, Inc., Dallas, TX) with 24-32  
191 electrodes aligned perpendicular to the cortical surface. Example waveforms were all simultaneously  
192 recorded from a single probe. (C) MRI coronal slice, monkey O. 3mm black bar is approximately equal to  
193 the distance spanned by electrodes on 32-channel probes. Same landmark labels as in (A).

194 The emergence of laterality after the onset of the instruction cue mirrored the emergence of general  
195 unit modulation: A contralateral bias was present in PMd during the Instruct phase and then became  
196 present in both PMd and M1 during movement. Mean arm preference in PMd showed a modest but  
197 significant bias in the contralateral direction during the Instruct phase (one-sample t-test – monkey O:  
198  $\mu_{\text{Instruct}}=0.11$ ,  $p=7.0e-8$ ; monkey W:  $\mu_{\text{Instruct}}=0.16$ ,  $p=1.8e-4$ ) and showed no significant change between  
199 Instruct and Move (paired-sample t-test – monkey O:  $\mu_{\text{Move}}=0.15$ ,  $p=0.11$ ; monkey W:  $\mu_{\text{Move}}=0.13$ ,  
200  $p=0.65$ ). Mean arm preference in M1 did not show a significant contralateral bias until the Move phase  
201 (one-sample t-test – monkey O:  $\mu_{\text{Instruct}}=0.03$ ,  $p=0.13$ ;  $\mu_{\text{Move}}=0.07$ ,  $p=0.013$ ; monkey W:  $\mu_{\text{Instruct}}=0.02$ ,  
202  $p=0.31$ ;  $\mu_{\text{Move}}=0.20$ ,  $p=5.1e-11$ ).

203 While shifts in the means were modest, changes in arm preference across phases were most evident in  
204 the emergence of a subset of units that strongly preferred one arm or the other (Figure 4C). These arm-  
205 dedicated units typically preferred the contralateral arm, demonstrated by increased occupancy in the  
206 contralateral tails of the arm preference distributions; however, a small proportion of the population  
207 was exclusively modulated during ipsilateral trials as well (Figure 4B). Despite much of the population  
208 remaining arm-neutral (arm preference near 0) or preferring the ipsilateral arm, the emergence of  
209 strongly contra-dedicated units was sufficient to drive contralateral shifts in the population mean. In  
210 summary, despite much of the population remaining arm-neutral, an increasing number of highly arm-  
211 dedicated units emerged with each task phase, primarily favoring the contralateral arm.

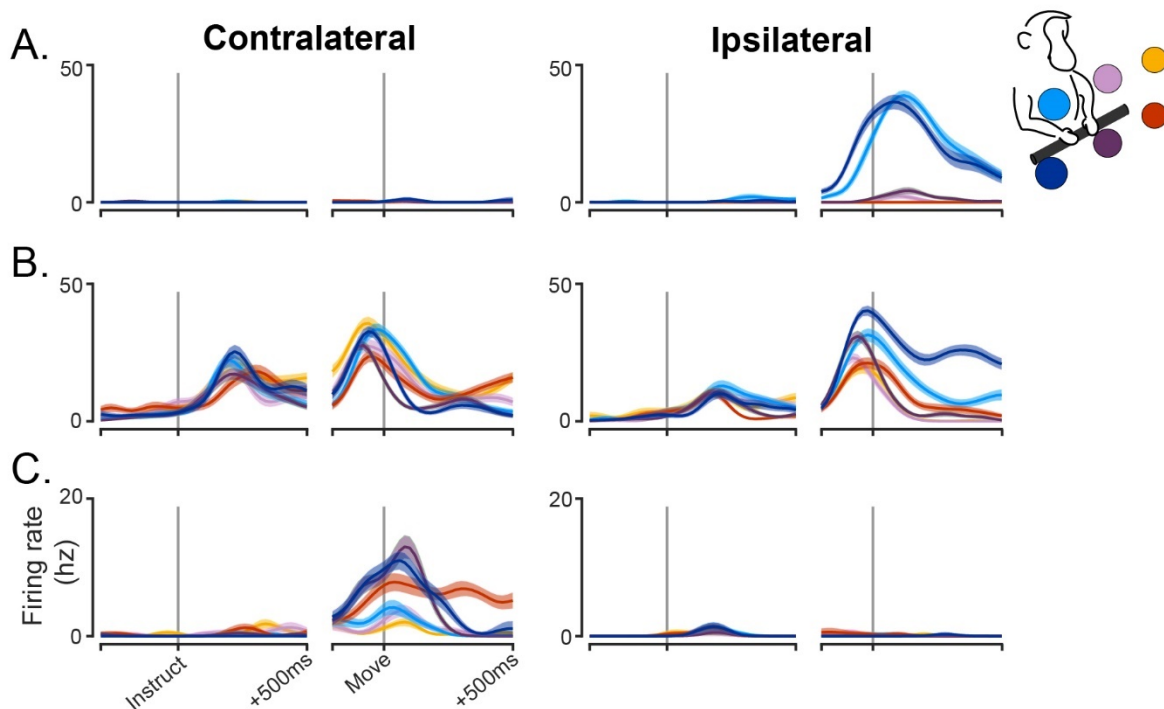

212  
213 **Figure 3. Firing rate traces of example single-units.**

214 Trial-averaged firing rates for 3 example single-units, all from the left hemisphere. Each color represents  
215 a different target according to the color-coding in the top right. Mean  $\pm$  SEM. (A) An M1 unit  
216 exclusively modulated during ipsilateral movements. (B) A PMd unit with both Instruct and Move phase  
217 modulation for both arms. (C) A PMd unit with modest contralateral modulation during the Instruct  
218 phase and strong contralateral modulation during movement, but no modulation on ipsilateral trials.



219

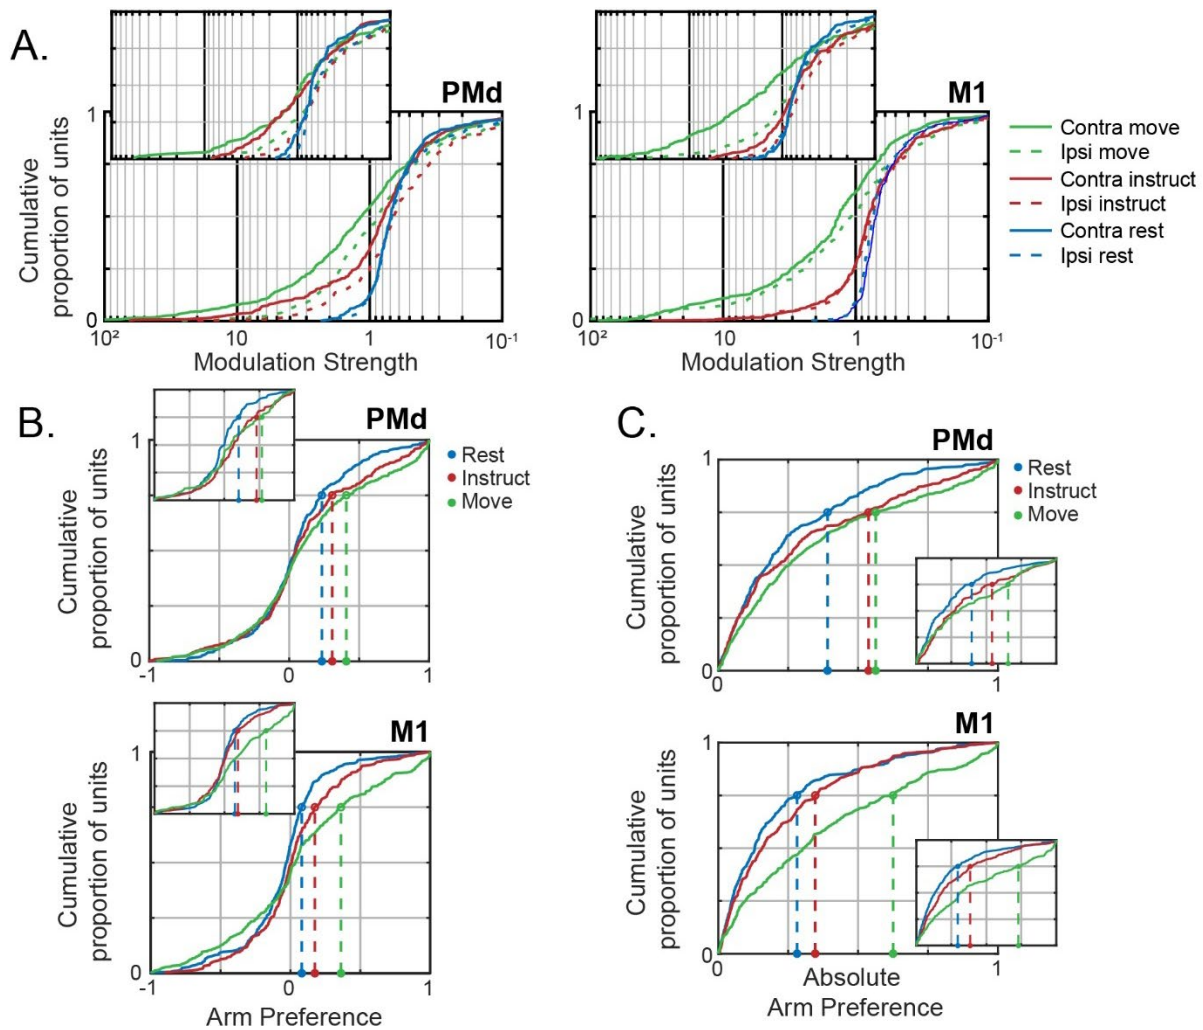

220

221 **Figure 4. An increasing number of arm-dedicated units emerge with each task phase.**

222 (A) Cumulative distribution of single-unit modulation during each phase, arm. Left panel PMd, right  
 223 panel M1. Large values cut off by plot: monkey O Contra Move [134(PMd), 133(PMd), 104(PMd)], Ipsi  
 224 Move [234(M1), 181(M1), 130(M1)]; monkey W Contra Move [125(M1)]. (B) Cumulative distribution of  
 225 arm preferences during each phase. Top panel PMd, bottom panel M1. Negative values are ipsi-  
 226 preferring, positive values are contra-preferring. Circles and vertical dashed lines mark the upper  
 227 quartile of each distribution (C) Same as (B), but using the absolute value of arm preference to indicate  
 228 arm dedication, independent of hemisphere. For all plots: monkey O main, monkey W inset.

229

230 Modulation preferentially occurs within arm-dedicated units

231 There are two primary means by which population signals can specify the selected arm at each phase.  
232 (1) Arm-neutral units may maintain unique covariance structure for each arm that separates signals  
233 along different neural dimensions at the population level. (2) Arm-dedicated units may dominate the  
234 population response, thereby representing the majority of population variance in dedicated sub-  
235 populations. The latter possibility is investigated over the following two sections. First, we consider  
236 whether modulation preferentially occurs in units that are strongly dedicated to one arm or the other.

237 We performed a regression analysis to quantify the relationship between strength of arm preference  
238 and modulation for the preferred arm. Importantly, arm preference and modulation were calculated  
239 from independent data sets so that there is no mathematical linkage between the two measures when  
240 assessing their relationship. A slope of 1 corresponds to an order of magnitude increase in modulation,  
241 on average, when comparing perfectly arm-neutral units with fully arm-dedicated units. As seen in  
242 Figure 5A, the slopes are initially near zero and then become positive over time. To quantify these  
243 changes, we used a multi-factorial permutation approach to test for effects of Area (PMd, M1), Phase  
244 (Rest, Instruct, Move), and Preferred Arm (Ipsi, Contra) on the population slopes.

245 We found a main effect of Phase in both animals (monkey O:  $p=1.0e-4$ , monkey W:  $p=1.0e-4$ ): a positive  
246 correlation between arm preference and modulation strength emerged and strengthened across task  
247 phases (Figure 5A-B). By the Move phase, there was approximately a ten-fold increase in the modulation  
248 strength of arm-dedicated units when compared to arm-neutral units. Since PMd displayed greater  
249 modulation than M1 during preparation but not movement, we tested whether the two areas had  
250 differing slopes in each phase independently. We found a significant simple effect of Area during the  
251 Instruct phase (monkey O:  $p=3.0e-4$ ; monkey W:  $p=6.3e-3$ ) but not the Move phase (monkey O:  $p=0.13$ ;  
252 monkey W:  $p=0.91$ ). Thus, the relationship was more prominent within PMd prior to movement, while  
253 the two areas became roughly equivalent following movement initiation. This was confirmed with a test  
254 for 2x2 interaction (monkey O:  $p=0.025$ ; monkey W:  $p=9.9e-3$ ).

255 Given the overall contralateral bias, we further tested whether this relationship held for both contra-  
256 and ipsi-preferring units. For the contra-preferring units, there was a significant simple effect of Phase  
257 (monkey O:  $p=1.0e-4$ ; monkey W:  $p=1.0e-4$ ). For the ipsi-preferring units, the Phase effect was  
258 significant for monkey O ( $p=1.0e-4$ ), but only trended in this direction for monkey W ( $p=0.087$ ), perhaps  
259 due to the lower amount of ipsilateral modulation in monkey W. Slopes were generally steeper for  
260 contra-preferring units. The simple effect of Preferred Arm was significant during the Instruct phase for  
261 both monkeys (monkey O:  $p=0.033$ ; monkey W:  $p=1.0e-4$ ), and significant for Monkey W during the  
262 Move phase (monkey O:  $p=0.53$ , monkey W:  $p=1.0e-4$ ). Given that there are also more contra-dedicated  
263 units than ipsi-dedicated units, these results suggest that a larger proportion of the contralateral signal  
264 was localized within dedicated sub-populations compared to the ipsilateral signal. We directly test this  
265 conjecture in the following section where we consider population-level implications of these results.

266

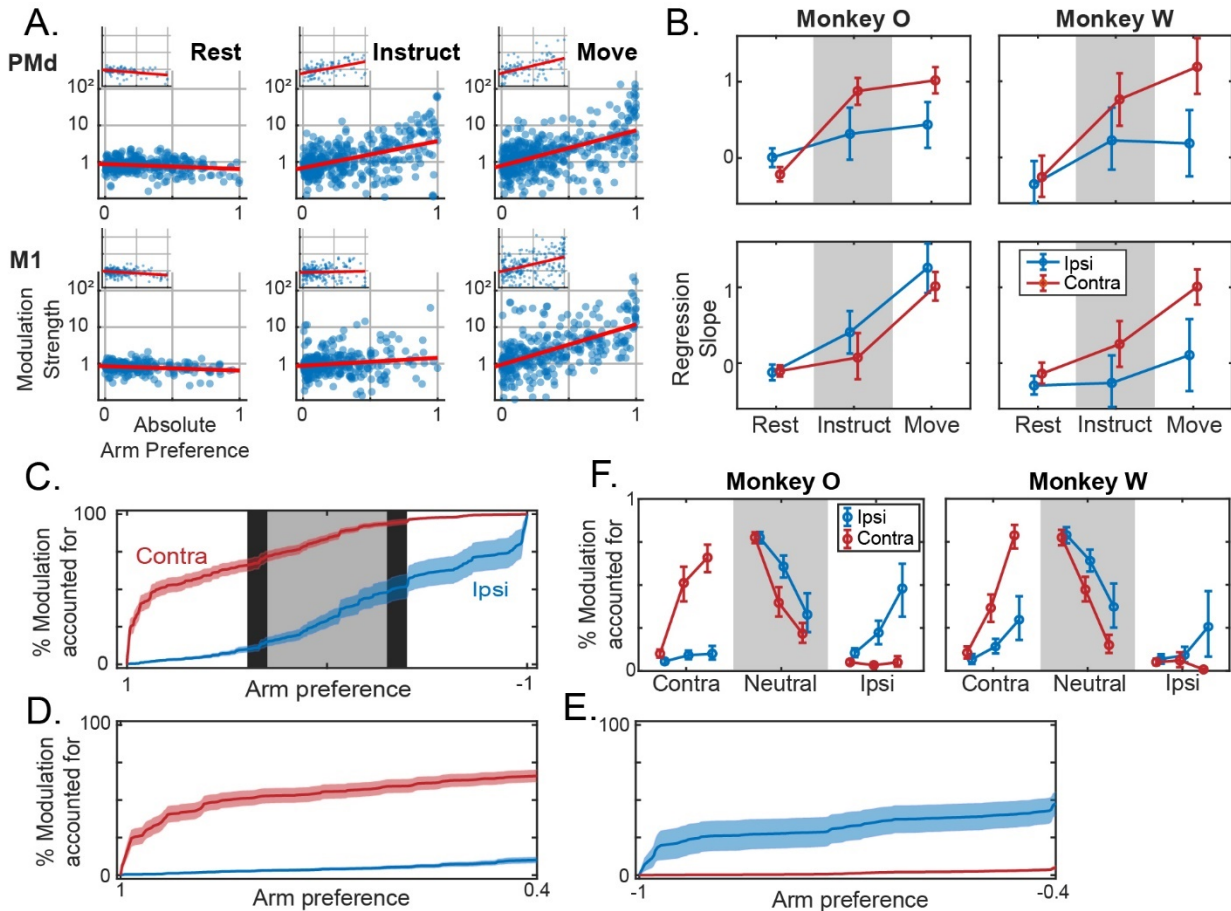

267

268 **Figure 5. Neural activity is progressively consolidated within arm-specific subpopulations.**

269 (A) Modulation for the preferred arm plotted against arm preference, for all units in each brain area and  
 270 task phase. Log-linear best fit lines are displayed in red. Inset figures belong to Monkey W. (B) Slopes of  
 271 regression lines fit to data from (A), independently for ipsi- and contra-preferring sub-populations. Mean  
 272 +/- bootstrapped 95% confidence interval. (C-E) For the move phase in monkey O, cumulative  
 273 modulation plotted against arm preference, i.e. each point indicates the proportion of modulation  
 274 accounted for by all units with arm preference values to the left of the indexed position. Positive values  
 275 on the x-axis indicate contra-preferring, and negative values indicate ipsi-preferring. Shaded error bars  
 276 indicate bootstrapped standard error. (C) The full spectrum of arm preferences is shown. Shaded  
 277 backgrounds indicate three partitions: Contra-dedicated [0.4, 1] and Ipsi-dedicated [-1, -0.4] in white,  
 278 and Neutral [-0.3, 0.3] in grey. (D) Cumulative modulation within contra-dedicated regime. (E) Same as  
 279 (D), but ipsi-dedicated. Note inverted axis. (F) The proportion of modulation within each partition from  
 280 (C) during ipsi- or contralateral movements. Note that the total modulation is significantly lower for  
 281 ipsilateral movements, particularly for Monkey W, and these data are only displayed as proportions.  
 282 Mean +/- bootstrapped 95% confidence interval.

283 The population signal is largely confined to arm-specific sub-populations

284 The preceding analyses establish that there is an increase across task phases in the proportion of units  
285 that are strongly dedicated to a single arm, and that those units exhibit much more modulation in  
286 activity relative to arm-neutral units. This suggests that the population signal is progressively  
287 consolidating within arm-specific sub-populations even though many of the units remain arm-neutral.  
288 To visualize the segregation of overall modulation, we ordered all units based on arm preference and  
289 calculated their cumulative modulation (Figure 5C-E). Since PMd and M1 showed similar relationships in  
290 the previous analyses, we combined units from the two areas, analyzing them as a collective population.  
291 In the extreme case that population signals are entirely segregated, 100% of ipsilateral modulation  
292 would occur at an arm preference of -1, and 100% of contralateral modulation would occur at +1.

293 We focused on two core questions. (1) Does the proportion of dedicated modulation increase across  
294 task phases, indicating a progression towards independent signals? (2) Does the amount of independent  
295 (or dedicated) modulation differ for ipsi- and contralateral activation? As expected, dedicated sub-  
296 populations emerged that contained a large proportion of the modulation associated with movements  
297 of one arm and only a small proportion of the modulation associated with the other arm (Figure 5C-F).  
298 For statistical testing, we split the arm preference domain into 3 equal width regimes, corresponding to  
299 contra-dedicated (arm preference > 0.4), ipsi-dedicated (arm preference < -0.4), and arm-neutral (-0.3 <  
300 arm preference < 0.3) units, and summarized the data by expressing the proportion of modulation  
301 contained within each regime (Figure 5F). We again used a multi-factorial permutation approach to test  
302 for effects of Phase (Rest, Instruct, Move), and Arm (Ipsi, Contra). We will refer to ipsilateral modulation  
303 in the ipsi-dedicated units simply as 'ipsi-dedicated modulation' and vice-versa for contra-

304 For both animals, the effect of Phase was significant in the contralateral responses ( $p=1.0e-4/1.0e-4$ ),  
305 with the proportion of contra-dedicated modulation increasing across phases (Figure 4F, red lines). Ipsi-  
306 dedicated modulation increased across task phases for both monkeys as well (Figure 4F, blue lines),  
307 although this effect was only significant for monkey O ( $p=9.0e-4$ ; monkey W:  $p=0.31$ ). There was a  
308 significant interaction between Arm and Phase for both monkeys (monkey O:  $p=1.0e-4$ ; monkey W:  
309  $p=1.0e-4$ ), indicating the stronger emergence of contra-dedicated modulation as compared to ipsi-  
310 dedicated modulation. Both animals showed a simple effect of Hand during the Instruct phase (monkey  
311 O:  $p=1.0e-4$ ; monkey W:  $p=1.0e-4$ ), with more contra-dedicated modulation being observed than ipsi-  
312 This effect was also significant during the Move phase for monkey W ( $p=1.0e-4$ ) and approached  
313 significance for monkey O ( $p=0.056$ ).

314 These results suggest that arm signals consolidate within exclusive sub-populations throughout  
315 preparation. Moreover, contralateral signals are more independent than ipsilateral signals, in the sense  
316 that a larger proportion of the contralateral modulation was represented in contra-dedicated units.  
317 Importantly, this characterization of the population response captures most of the modulation for each  
318 arm in mutually exclusive sub-populations, which we will refer to as the 'localized' component. It is  
319 important to emphasize that these sub-populations are not fully localized in terms of brain area or  
320 hemisphere. While units that were dedicated to a single arm were typically located in the contralateral  
321 hemisphere, some were located in the ipsilateral hemisphere and in both PMd and M1. Returning to the  
322 possibilities outlined at the beginning of the previous section, we therefore conclude that the dominant  
323 characterization of the population response is this localized component – dominant in the sense that it  
324 represents the majority of modulation across the population.

325 Neural subspaces for the two arms diverge across task phases

326 We next sought to characterize the time course of changes in neural subspaces as movements were  
327 prepared and executed. We hypothesized that localized activation would drive population signals into  
328 diverging subspaces for the two arms. For these analyses, we pooled units from the left and right  
329 hemispheres. Using PCA, we first estimated the dimensionality of the neural subspace during each task  
330 phase using a cross-validated data reconstruction method (see Methods; Yu et al., 2009). This is an  
331 essential step to avoid drawing conclusions based on noise-dominated dimensions. Dimensionality was  
332 calculated separately for each session and arm. During Rest, the dimensionality was approximately 5-6,  
333 and decreased to approximately 4 during the Instruct and Move phases (Figure 6A). We therefore opted  
334 to focus on only four components to represent the neural subspaces of each dataset.

335 We calculated the alignment between PCA subspaces associated with left or right arm movements using  
336 a metric that describes the proportion of low-dimensional variance for one dataset that is captured in  
337 the low-dimensional space of another (see Methods; Athalye et al., 2017). If the network is organizing  
338 activity in the same way across datasets, then the covariance alignment is 1, regardless of signal  
339 magnitude. If activity is reorganized into orthogonal subspaces across datasets, then the covariance  
340 alignment is 0. Two types of alignment measurements were made: (1) Subspaces were fit to random  
341 partitions of trials for the same arm – what we will refer to as ‘native’ alignment – giving us an estimate  
342 of natural variability in our subspace estimates when compared over the same time window, and  
343 describing the evolution of the motor plan when comparing across time windows. (2) Subspaces were fit  
344 separately using trials for either arm and compared with each other – what we will refer to as ‘cross’  
345 alignment – describing the divergence of the subspaces for the two arms at each task phase.

346 Using single-trial activity event-locked to the onset of instruction and movement, we were able to  
347 capture the fine-timescale evolution of any emerging or diverging subspaces (Figure 6B-C). When  
348 comparing the native alignment across task phases, we observed the emergence of distinct Instruct and  
349 Move period subspaces. Figure 6B shows these data displayed as a continuous heat map with block  
350 diagonal structure that coincides with the phase transitions. Within each phase native alignment was  
351 high, indicating consistent low-dimensional structure in the population activity that was specific to each  
352 stage (Figure 6B; Figure 6D filled circles).

353 As expected, subspaces for the two arms gradually diverged across task phases (Figure 6C; Figure 6D  
354 open circles). On the whole, subspaces for the two arms were significantly less aligned than the (cross-  
355 validated) comparisons within the same arm (Figure 6D open vs filled circles; two-way ANOVA, ME  
356 comparison type – monkey O:  $p=7.8e-68$ ; monkey W:  $p=4.2e-37$ ). Interestingly, subspace divergence  
357 was already apparent during the Rest phase (paired sample t-test, native-Rest vs cross-Rest – monkey O:  
358  $p=1.2e-15$ ; monkey W:  $p=1.3e-10$ ). As mentioned in our analysis of single-unit arm preferences, this is  
359 likely due to predictable arm assignments from the blocked task structure (Figure 1C, Figure S1). Cross  
360 alignment decreased significantly as the trial unfolded, reaching a minimum during movement (one-way  
361 repeated measures ANOVA – monkey O:  $p=1.4e-7$ ; monkey W:  $p=5.9e-8$ ). These results map closely onto  
362 the progressive localization described in the previous section.

363

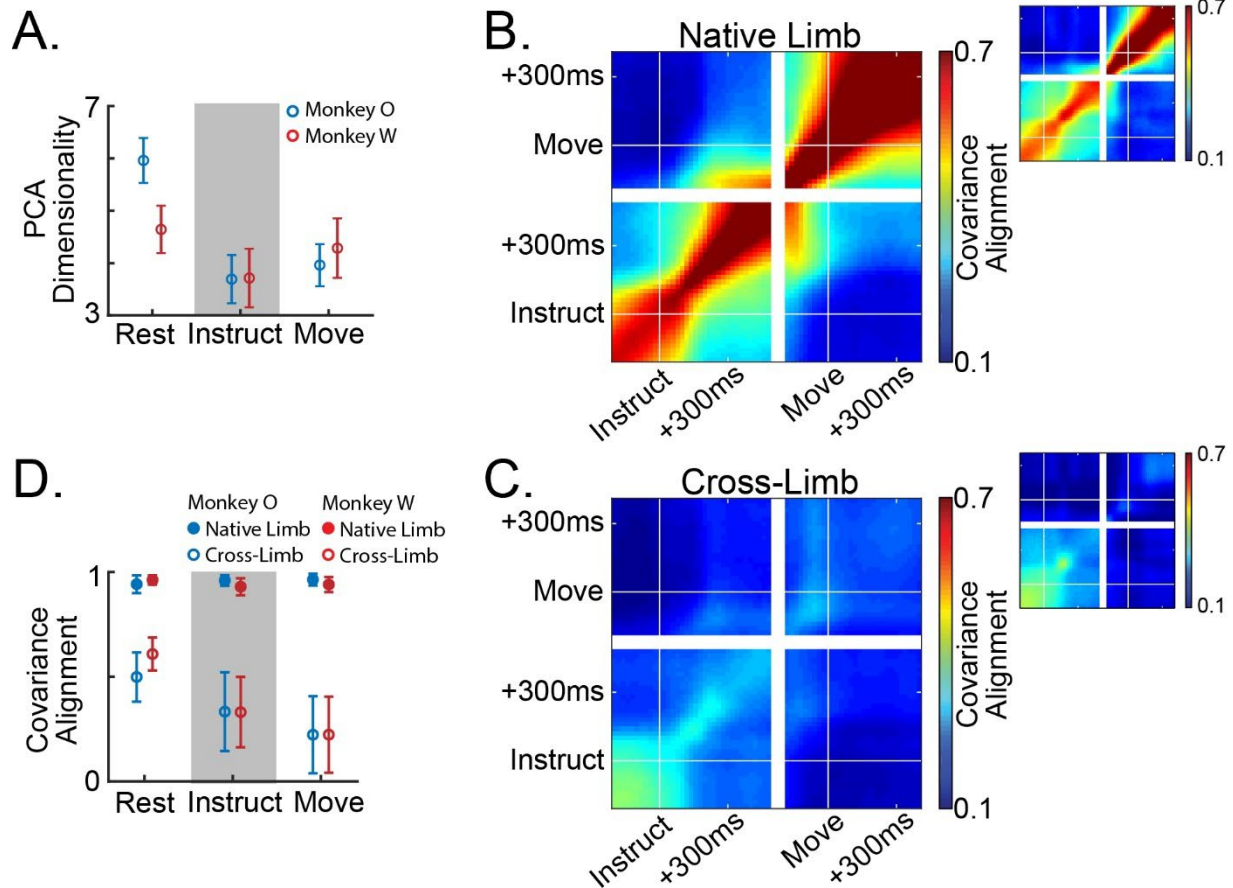

364

365 **Figure 6. Population activity reorganizes and diverges for the two limbs throughout planning.**

366 (A) Dimensionality of the PCA subspace estimated as the number of components that minimizes the  
367 cross-validated reconstruction error of the full-dimensional neural data. Mean +/- standard error across  
368 datasets. (B,C) Heat maps indicate alignment of 4-dimensional PCA subspaces between all pairs of  
369 timepoints across the Instruct and Move phases of the task, averaged across sessions. (B) Compares  
370 subspaces across time for movements of the same arm. Three blocks forming along the diagonal  
371 indicate three distinct subspaces: a pre-instruction 'Rest' space, a post-instruction 'Instruct' space, and a  
372 peri-movement 'Move' space. (C) Compares subspaces across time for movements of opposite arms.  
373 Prior to instruction there is a moderate alignment of the subspaces for each limb, however, the two  
374 subspaces diverge around 100ms post instruction. (D) Summary of the data in (B,C). Mean +/- standard  
375 deviation across datasets.

376 Subspace separation relies upon localized signals

377 Activity within mutually exclusive sub-populations naturally separates into distinct linear subspaces; as  
378 such, we can expect some level of subspace separation as a simple result of variance in arm-dedicated  
379 units. However, it is possible that subspace separation could occur within a distributed representation as  
380 well (Ames and Churchland 2019; Heming et al, 2019). This question is especially important in  
381 considering arm-neutral units. Even though these units, by definition, show similar levels of activity  
382 during contra- and ipsilateral movement, it is possible that their population-level contributions are  
383 different for these two types of movements, and thus also contribute to subspace separation.

384 To investigate the extent to which subspace separation relied upon localized activation, we analyzed the  
385 structure of PCA subspaces via their coefficient weights. Since components of PCA models form an  
386 orthogonal basis set, each can be independently analyzed to determine its contribution to subspace  
387 divergence. We fit separate PCA models for each arm and task phase and calculated two statistics for  
388 each component: (1) To capture the contribution of a given component to subspace separation, we  
389 calculated the ratio of variance it captured for the two arms (right/left). (2) To capture the dependence  
390 of a given component on arm-dedicated units, we calculated a coefficient-weighted average of the arm  
391 preferences for all units (e.g., if non-zero weights were only given to right arm dedicated units, this value  
392 would be 1; if weights were evenly distributed across the spectrum of arm-preferences, this value would  
393 be 0). A strong relationship between these two metrics would suggest that subspace separation relies  
394 upon localized activation.

395 Indeed, this was the case during both the Instruct and Move phases. Figure 7A-C shows a single session  
396 example from the Move phase. The top principle components captured a large amount of the variance  
397 for the left arm while capturing little variance for the right arm. Components with a variance ratio  
398 strongly favoring the left arm almost exclusively weighted units that were themselves highly dedicated  
399 to the left arm. The lower components with more balanced variance ratios distributed weights more  
400 evenly across the arm preference spectrum. This pattern was evident in each phase throughout  
401 recordings from both monkeys. Figure 7D shows the relationship between right/left variance ratio and  
402 coefficient-weighted arm preference for the top five principal components of each dataset. Following  
403 the instruction cue, components that strongly discriminated between the two limbs (variance ratio far  
404 from 1) primarily weighted units that were themselves highly discriminating. This relationship remained  
405 strong as the range expanded during the Move phase. The same pattern was observed when firing rates  
406 were normalized using an alternative method to avoid overrepresentation of highly modulated units  
407 (Figure S2A). In summary, these results suggest that the subspace separation described in the previous  
408 section relies upon unit-level signal localization.

409 Additional distributed signal contains behaviorally specific information about both arms

410 The preceding sections make clear that the population signal is dominated by a localized organization.  
411 Nonetheless, it is likely that the arm neutral units also provide a meaningful distributed component, one  
412 that coexists with the localized one. These units may contain behaviorally specific information that is  
413 obscured by the high magnitude localized signal when analyzing the population response at large. To  
414 test this hypothesis, we divided the entire population of units from both hemispheres and brain areas  
415 into two subgroups based on the preferred arm of each unit from a held-out dataset (Figure 8A). If the  
416 signals are entirely localized, each sub-population would only contain information about its preferred

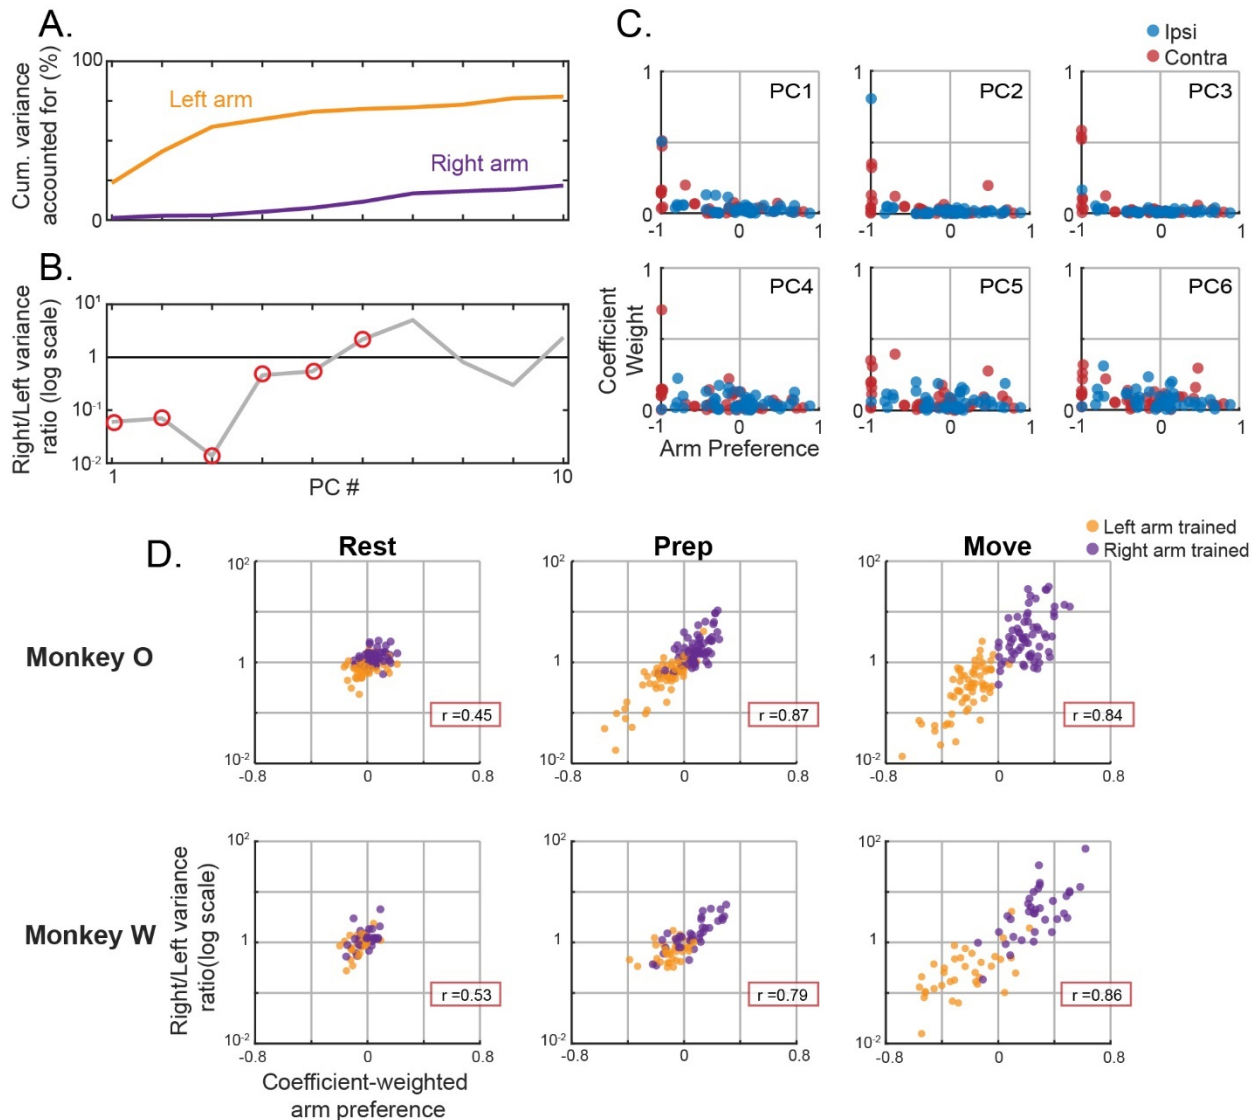

417

418 **Figure 7. Separation of arm-specific subspaces relies upon unit-level segregation.**

419 (A-C) Single session example of a PCA model trained to capture bi-hemispheric activity during left arm  
 420 movements. Held-out testing data for 86 simultaneously recorded units were used. (A) Cumulative  
 421 proportion of variance accounted for across the top 10 principal components. (B) For each component,  
 422 the ratio of the explained variance between the two limbs. (C) Absolute values of the coefficient weights  
 423 for each component plotted against the corresponding unit's arm preference. Top row represents  
 424 components 1-3; bottom row represents components 4-6. Positive arm preference values indicate right  
 425 arm preferring units. (D) The component variance ratio for the two arms plotted against a coefficient-  
 426 weighted average of the arm preferences for each unit in that component. Datapoints represent the top  
 427 5 principal components of left or right arm trained models across all sessions. Separate models for each  
 428 phase are plotted in each column. Pearson correlation coefficient for each dataset is displayed in the red  
 429 box. Top row monkey O, bottom row monkey W.

430



431 arm (e.g., a left arm-preferring sub-population would be predictive of left but not right arm  
432 movements). However, if there is some amount of distributed coding, then each sub-population will  
433 contain both localized and distributed information about its preferred arm, but only distributed  
434 information about its non-preferred arm.

435 We first analyzed the time course of modulation for each sub-population during movements of the  
436 preferred and non-preferred arms. While modulation during preferred-arm trials was much stronger in  
437 the Instruct and Move phases, there was a small amount of modulation during trials of the non-  
438 preferred arm as well (Figure 8B). To determine whether this modulation carried precise information  
439 about the behavior, and not just non-specific changes related to task engagement or small movements  
440 of the non-selected arm, we trained linear discriminant analysis (LDA) classifiers to predict the target on  
441 each trial. Even though the units showed very little modulation when the non-preferred limb was used,  
442 prediction accuracy was above chance (Figure 8C-E, paired sample t-test with Rest – monkey O: Instruct  
443  $p=1.5e-12$ , Move  $p=4.1e-21$ ; monkey W: Instruct  $p=1.8e-3$ , Move  $p=1.1e-7$ ). This suggests that the  
444 population code is not entirely localized but contains a meaningful distributed component as well. We  
445 refer to this as ‘distributed’ in the sense that the contributing units reflect information about both arms.

#### 446 Distributed code is contained in a shared subspace for the two arms

447 We next asked whether subspace separation exists specifically within the distributed portion of  
448 population activity. This is a non-trivial question given that localized activity dominates the population  
449 response in terms of explained variance. We again partitioned the population based on preferred arm  
450 and fit 4-D PCA models to the neural activity obtained from trials in which the movement was produced  
451 by the non-preferred arm. This is a conservative approach for capturing only the distributed signals,  
452 since localized activity will be absent during reaches of the non-preferred arm. We will refer to the  
453 subspace spanned by these models as the ‘distributed’ subspace.

454 Having isolated the distributed population structure, we can project neural data from both preferred  
455 and non-preferred arm trials onto this subspace and compute the amount of variance captured for each  
456 arm. If there is meaningful separation of arm-specific subspaces, then the activity of the preferred arm  
457 would be largely in the null space of this projection. We would therefore expect the distributed  
458 subspace to capture more variance (as a raw measure, not proportion of total) during trials of the arm it  
459 was fit to (the non-preferred arm). Alternatively, if the distributed signal exists within a shared subspace  
460 for the two arms, then the patterns of activity for either arm would be preserved through the  
461 projection, and we should expect as much or more variance captured for the preferred arm.

462 Across all task phases and for both animals, more variance was accounted for during preferred arm trials  
463 than during non-preferred arm trials (Wilcoxon signed rank –  $p<0.05$  for all six comparisons). Variance  
464 ratios (expressed as non-preferred over preferred) were below 1 for nearly every individual dataset and  
465 became even lower with each subsequent phase (Figure 8F). We note that a lower ratio does not  
466 precisely mean “more shared variance,” but rather, “more evidence against being unique.” We again  
467 used an alternative firing rate normalization method to confirm that this result was not dependent on  
468 overrepresentation of units with the strongest modulation (Figure S2B). In summary, the subspace  
469 capturing distributed activity is not unique to the arm it was fit to, but rather represents a shared  
470 subspace for population activity associated with either arm.

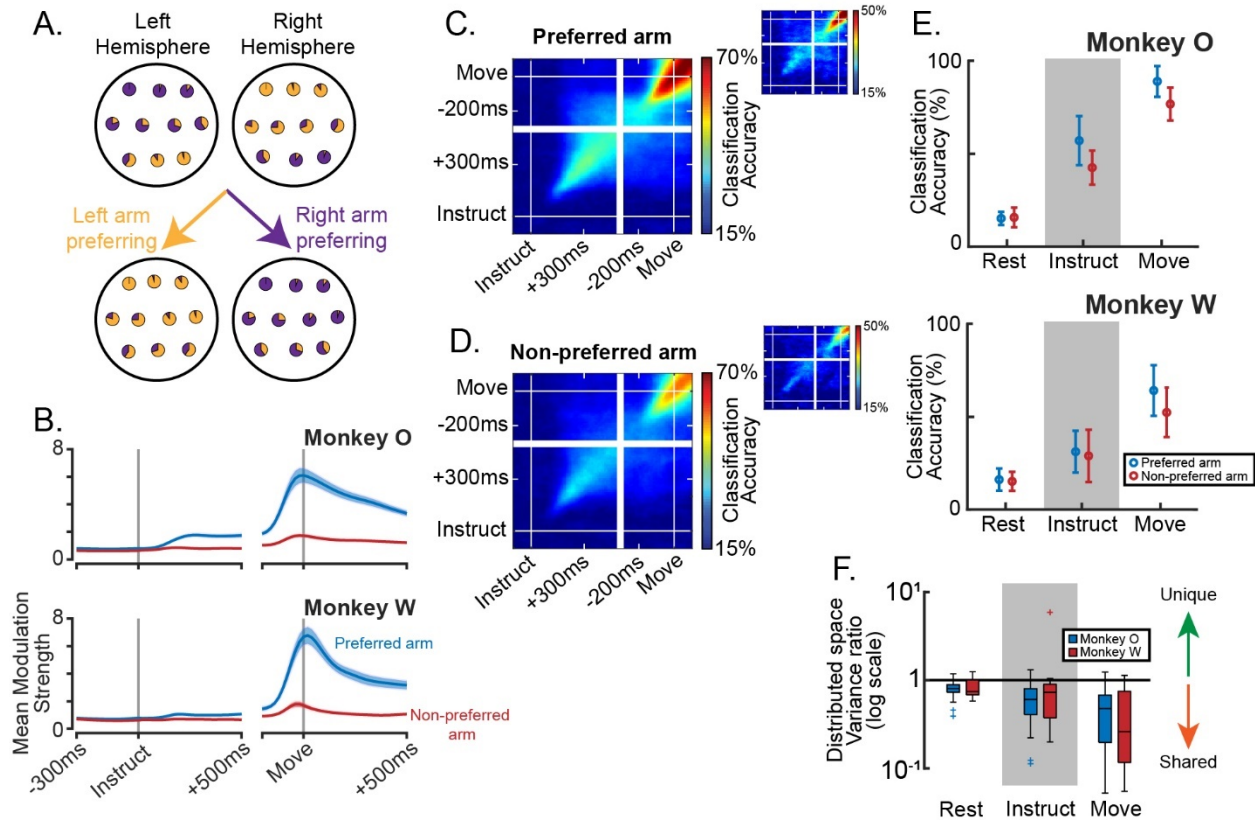

471

472 **Figure 8. Behaviorally specific information exists within a subspace that captures bilateral activity.**

473 (A) Illustration of the population partitioning approach. Each unit is represented as a pie-chart displaying  
 474 the relative modulation during left and right arm trials. Most units in the left hemisphere are more  
 475 strongly modulated during right arm movements (mostly purple pie-charts), yet some prefer left arm  
 476 movements (mostly yellow pie-charts). Regardless as to which hemisphere each unit is in, the  
 477 population may be subdivided into left and right arm preferring sub-populations. On the extreme that all  
 478 information about each arm is contained within dedicated sub-populations, this simple division will fully  
 479 segregate the signals such that movements of the non-preferred arm cannot be classified. (B)  
 480 Modulation as a function of time, taken as the mean over all units during trials of their preferred or non-  
 481 preferred arm, +/- standard error. (C) Target classification accuracy using LDA for movements of the  
 482 preferred arm. Models are trained on each time point and tested on each time point to provide high  
 483 temporal resolution and inform cross-phase generalization of the classifier. Plots are averaged over all  
 484 sessions (13 Monkey O, large plots; 7 Monkey W, small plots) and both sub-populations (left-preferring,  
 485 right-preferring). (D) Same as (C), but for non-preferred arm movements. (E) Summary data of (C,D) for  
 486 monkey O, top panel, and monkey W, bottom panel. Mean +/- standard deviation across datasets. (F)  
 487 Ratio of the variance captured in the distributed subspace for the two limbs.

488

## 489 **DISCUSSION**

490 We have shown that the combined population response spanning PMd and M1 across hemispheres  
491 contains two primary components. The first is supported by unique sub-populations representing each  
492 arm primarily, but not entirely, within the contralateral hemisphere. This component first emerged  
493 within PMd after instruction and became most prominent during movement when M1 became strongly  
494 engaged. Despite much of the population being arm-neutral, there was a bias for stronger modulation  
495 within arm-dedicated units. The majority of modulation was therefore localized within units that were  
496 devoted to one arm or the other. This localized organization resulted in trivial separation of the neural  
497 subspaces associated with movements of each arm. We also found a second component that leveraged  
498 shared signaling within units. This component was much smaller in magnitude but contained  
499 behaviorally specific information that could be used to accurately classify reaching targets. In contrast to  
500 the natural separability of the localized component, this distributed component mixed signals for the  
501 two arms within the same subspace.

### 502 Progressive localization of arm-dedicated signals

503 To our knowledge, this study is the first to compare low-dimensional population structure during  
504 preparation of left vs right arm reaching. It has been proposed that neural subspaces reorganize  
505 between preparation and execution of reaching movements (Elsayed et al., 2016). Given that previous  
506 studies have reported increases in the number of lateralized units during the transition from preparation  
507 to movement (Cisek and Kalaska, 2003; Li et al., 2015), we thought that activity may consolidate into  
508 arm-specific sub-populations, primarily in the contralateral hemisphere, as the population reorganizes  
509 between task phases. This would result in localized representations of the two arms, in the sense that  
510 each sub-population is primarily active only during movements of its respective arm. However, it has  
511 been recently proposed that even during active behavior, signals for the two arms are mixed at the level  
512 of single-units (i.e. distributed representation) but separate into unique linear subspaces (Ames and  
513 Churchland, 2019; Heming et al., 2019). The only clear separation of arm-specific signals that we  
514 observed during any phase occurred at the single-unit level (Figure 5). We found no evidence that signal  
515 separation was an emergent property of population-level analysis. While we did observe a large  
516 proportion of arm-neutral units (Figure 4B), careful analysis of model structure revealed that arm-  
517 dedicated units drove the separation of arm-specific neural subspaces (Figure 7). This segregation was  
518 particularly pronounced during movement, thus reducing any concern that small movements of the  
519 non-selected arm had an impact on our results or conclusions.

520 Importantly, contralateral signals were more independent than ipsilateral ones – a larger proportion of  
521 contralateral modulation occurred in contra-dedicated units than the reverse case for ipsi- (Figure 5).  
522 This was not a surprising result, as contralateral bias in the functional organization of motor cortex has  
523 been clearly revealed by effects stroke (Hatem et al., 2016), lesion studies (Brinkman and Kuypers,  
524 1973), and cortical stimulation (Penfield and Boldrey, 1937; Alagona et al., 2001; Montgomery et al.,  
525 2013). One candidate hypothesis for the presence of ipsilateral activity has been that it supplies its own  
526 independent control signal. There is some evidence that ipsilateral cortex plays an increased role in  
527 movement following hemispheric damage (Brinkman and Kuypers, 1973; Hummel and Cohen, 2006;  
528 Dancause, 2006; Wilkins et al., 2020), though not necessarily a beneficial or compensatory one. The  
529 magnitude of ipsilateral encoding also increases with the degree of movement complexity (Verstynen et  
530 al., 2005) and may involve spatially distinct neural populations (Ziemann et al., 1999; Chen et al., 2003).  
531 Anatomically, the corticospinal tract (CST) is almost entirely contralateral, and the effectiveness of the

532 ipsilateral component has been debated (Lacroix et al., 2004; Rosenzweig et al., 2009; Soteropoulos et  
533 al., 2011; Baker et al., 2015). Ipsilateral cortex may also exert its influence via connections made in the  
534 reticular formation (Alagona et al., 2001; Baker et al., 2015; Wilkins et al., 2020), which projects to  
535 ipsilateral spinal cord. These reticulospinal pathways may also be responsible for preparatory  
536 modulation of muscle spindles (Papaioannou and Dimitriou, 2020), which is relevant to the weak  
537 emergence of independent activity we observed during the Instruct phase. Our results showed a small  
538 amount of independent ipsilateral activity (monkey O more so than monkey W), with more of the  
539 ipsilateral signal coming from non-dedicated units (Figure 5). Thus, if the ipsilateral hemisphere provides  
540 any independent control signal, it is much weaker than the contralateral signal. Rather, our results  
541 suggest a role in bimanual coordination or higher-level processing, which we now discuss.

542

#### 543 Bilateral signals and their role in motor control

544 Our study adds to a large body of existing work reporting activity related to both ipsi- and contralateral  
545 arms in the same single-units during preparation (Hoshi and Tanji, 2002; Cisek and Kalaska, 2003) and  
546 movement (Cisek and Kalaska, 2003; Ames and Churchland, 2019; Heming et al., 2019). The presence of  
547 these units implies some form of bilateral network or interhemispheric communication. Increases in  
548 excitability of homologous effectors during transcranial magnetic stimulation (TMS) (McMilan et al.,  
549 2006) and symmetric activation patterns in functional magnetic resonance imaging (fMRI) (Verstynen  
550 and Ivry, 2011; Diedrichsen et al., 2013) suggest that bilateral motor cortical circuits are organized with  
551 mirrored properties. Mirror activation and other forms of interhemispheric communication have been  
552 proposed to support intermanual skill transfer (Diedrichsen et al., 2013) or shaping of contralateral  
553 activity patterns during complex behavior (Verstynen et al., 2005). In the present study we have not  
554 directly compared directional tuning between ipsi- and contralateral arm movements, and therefore  
555 cannot speak directly to mirrored response properties. However, we did observe that the distributed  
556 component of bilateral signals existed within a shared subspace for the two arms (Figure 8). Mirror  
557 activity would necessarily reside in the same neural subspace for each arm, provided that subspace is  
558 linear, as all linear subspaces are invariant with respect to reflection. Our results are therefore  
559 consistent with functional hypotheses of ipsilateral cortex involving mirror symmetric activation.

560 Distinct bimanual encoding patterns in motor cortex have been observed in both human fMRI  
561 (Diedrichsen et al., 2013) and single-unit monkey studies (Donchin et al., 1998; Kazennikov et al., 1999).  
562 Surgical transection of the corpus callosum, the primary direct connection between hemispheres  
563 (Gazzaniga, 1989), disrupts typical spatial coupling and continuous synchronization of arm movements  
564 as well (Franz et al., 1996; Kennerly et al., 2002). These studies may suggest that bilaterally distributed  
565 networks facilitate bimanual coordination, a function historically attributed to the supplementary motor  
566 area (Brinkman, 1981). Our task involved unimanual movements, containing no component of  
567 coordination. However, the result that meaningful information coding existed within a shared subspace  
568 (Figure 8) is consistent with a role in coordination. Even during unimanual movements, one must  
569 coordinate bilateral drive to counter Coriolis forces acting on the opposite hemibody. We make limited  
570 claims on this hypothesis due to our simplified behavior, and stress that implicating a role in bimanual  
571 coordination does not simply mean revealing a shared substrate for signals of both limbs. Nonetheless, a  
572 bi-hemispheric network structure may underly computations for controlling the two arms as a unified  
573 plant (Welford, 1968). M1 has been implicated in multi-joint integration for voluntary movement and  
574 feedback control (Scott, 2003; Pruszynski et al., 2011). Bimanual behaviors have a similar task of

575 overcoming redundant degrees of freedom (Bernstein, 1967). Many patterns of behavior for each arm  
576 independently may help one achieve an action goal so long as cooperation of the two remains intact  
577 ('motor equivalence', Lashley, 1933). This lower-dimensional behavioral coordination space, sometimes  
578 called 'the uncontrolled manifold' (Scholz and Schoner, 1999), would likely have a similar neural  
579 manifold in which bilateral arm signals interact (for related discussion and review, see Swinnen and  
580 Wenderoth, 2004; Wiesendanger and Serrien, 2004; Diedrichsen et al., 2010). The distributed space that  
581 we report may reflect such a manifold.

582

### 583 A dynamical systems interpretation

584 One unified explanation for the two components identified in this study is that they reflect a  
585 computational (or "hidden") layer and an output layer for cortical processing. In this framework, the  
586 distributed signal would reflect a bilateral network that plays a supportive role in motor processing  
587 rather than direct output. The output itself would be represented by the localized signal. The idea that  
588 bilaterally distributed networks contribute to computations that do not directly represent the output  
589 has been previously proposed by Ames and Churchland (2019). Preparatory activity in motor areas  
590 reflects abstract features of action and may lack a strong contralateral bias (Hoshi and Tanji, 2002; Cisek  
591 and Kalaska, 2003). The distinctive lack of laterality in the distributed signal we observed is consistent  
592 with other reports of abstract preparatory responses. It played a relatively stronger role during  
593 preparation as well, since the localized component did not fully develop until movement. This aligns  
594 with reports that behaviorally specific features become more apparent in motor cortical signals during  
595 active behavior, including laterality (Shen and Alexander, 1997; Cisek and Kalaska, 2003).

596 From a dynamical systems perspective, bi-hemispheric circuitry underlying the distributed signal could  
597 serve to enforce internal dynamics of the overall population. Preparatory signals in pre- and primary  
598 motor cortex are thought to converge on an ideal population state, or initial condition, such that  
599 internal circuit dynamics will guide appropriate patterns of activity for the upcoming movement  
600 (Churchland et al., 2006; Shenoy et al., 2013; Li et al., 2016). In a rodent licking task, Li et al. (2015)  
601 showed that preparatory activity in premotor neurons projecting to other cortical areas lacked strong  
602 laterality, while those with descending output had a pronounced contralateral bias and became active  
603 closer to movement onset. They later showed that bilaterally distributed networks provide robustness  
604 to unilateral perturbation during preparation and hypothesized that the two hemispheres operate  
605 together to maintain the network state (Li et al., 2016). While we do not claim to present a clean  
606 dissociation like those done with cell-type specific methods, our results generally align with this form of  
607 network structure. In addition to setting the initial state, persistence of the distributed component  
608 during movement may reflect the ongoing dynamics of pattern generation (Shenoy et al., 2013; Sussillo  
609 et al., 2015).

610 Within this interpretation, the increasing localization of population activity would reflect emergence of  
611 descending output from the network and mirror the well-established laterality of anatomical pathways  
612 (Brinkman and Kuypers, 1973; Soteropoulos et al., 2011). It could also, at least in part, reflect a timing  
613 signal for transitioning the network from preparation to movement (Sussillo et al., 2015; Kaufman et al.,  
614 2016) while simultaneously specifying the selected effector. These roles are in apparent conflict with the  
615 observation that population signals begin to localize even prior to movement (Figure 5,6). If this  
616 localized component represents unilateral output, then at least some of that output must be involved in

617 movement-null processes. Indeed, preparatory modulation in spinal interneurons (Prut and Fetz, 1999;  
618 Fetz et al., 2002), H-reflex (Duque et al., 2010), and motor evoked potentials (Duque et al., 2010) has  
619 been observed. Cortical output may contribute to this modulation indirectly via pathways such as the  
620 reticulospinal tracts (Keizer and Kuypers, 1989; Buford and Davidson, 2004). Premotor areas make  
621 connections with both M1 and the spinal cord (Dum and Strick, 2002), and may therefore provide some  
622 corticospinal output during preparation or movement as well.

623 In summary, we present a parsimonious statistical description of how population activity spanning M1  
624 and PMd specifies motor plans for a single arm and provides unilateral output. The two components  
625 that we have identified will be crucial for contextualizing current theory on bilateral motor cortical  
626 processing as well as designing future experiments that investigate the independence and interaction of  
627 signals across the hemispheres.

628

## 629 **METHODS**

630

### 631 Behavioral recordings and task

632 Kinematic data were collected using LED-based motion tracking of several points along each arm  
633 (Phasespace Inc, San Leandro, CA). 3D positions of each LED were sampled at 240Hz. Prior to offline  
634 analysis, these positions were smoothed using a cubic spline and smoothing parameter 0.005 (*cspaps*  
635 function – MATLAB). The most distal LED, located on the back side of each hand just below the wrist,  
636 was used for online endpoint feedback and all offline analysis.

637 Monkeys were trained to perform a variant of an instructed-delay reaching task (Figure 1B). Endpoint  
638 feedback of each arm and all visual stimuli were presented to the animal using a custom-built virtual  
639 reality 3D display. This display consisted of two mirrors that projected shifted images independently to  
640 each eye to produce stereopsis. Cursors, indicating effector endpoint position, were color coded for the  
641 left (yellow) and right (purple) hands, as were all associated stimuli.

642 Each trial began with the appearance of the start positions for each hand (spherical targets, radius 4cm),  
643 located near the body on top of a physical bar that the monkey rested its hands on (Figure 1A). In a self-  
644 initiated manner, the monkey would assume the start position by placing both cursors in their  
645 appropriate starting positions and maintaining that position for 500 ms ('Rest' phase). Our threshold for  
646 detecting movement online was 9cm/s; breaking this threshold would abort the trial.

647 Marking the beginning of the 'Instruct' phase, a cue (spherical target, radius 3cm) would appear at one  
648 of six locations within a fronto-parallel plane 8cm in front of the start positions (Figure 1A). The color of  
649 the cue indicated the required arm, and position of the cue was the target location for the forthcoming  
650 reach. The instruction cue remained visible through the delay period, a duration that was sampled  
651 uniformly on the interval 500-1500ms. Movement beyond the speed threshold with either hand would  
652 abort the trial.

653 At the end of this period, two simultaneous changes signaled the monkey to move and marked the start  
654 of the 'Move' phase. First, the sphere defining the start position for the cued arm disappeared. Second,  
655 the cue at the target location enlarged (3cm to 4cm radius). The monkey then reached toward the target  
656 and once at the terminal location, had to maintain that position for 250ms. To earn a juice reward, the

657 animal had to initiate the reach within 500ms of the onset of the imperative, terminate the movement  
658 within the target's circumference, and keep the non-reaching hand stationary for the duration of the  
659 trial. To further emphasize that the trial was successful, the target turned green.

660 300ms windows were used to represent each phase in data analysis. For the Rest phase, we used the  
661 final 300ms before the onset of the instruction cue. For the Instruct phase, we used data in the interval  
662 between 200ms to 500ms post-cue. For the Move phase, we used the first 300ms following the onset of  
663 movement, defined as when speed of the reaching hand exceeded 10cm/s. We used a late window for  
664 the Rest phase to avoid any residual activity associated with moving to the start positions. The steady  
665 state neural response was used to position the Instruct phase window; this was reached approximately  
666 200ms after the onset of the instruction cue (see Figure 7B). The Move window was selected to capture  
667 peak neural activity associated with movement while including only the feed-forward portion, which  
668 typically lasted 250-300ms (Figure 1C, bottom row). Reach durations were calculated as the time  
669 between movement onset and the first point where (1) movement speed dropped below 20cm/s, and  
670 (2) velocity in the depth direction reached 0.

671

#### 672 Surgical implantation

673 All procedures were conducted in compliance with the National Institutes of Health Guide for the Care  
674 and Use of Laboratory Animals and were approved by the University of California at Berkeley  
675 Institutional Animal Care and Use Committee. Two adult male rhesus monkeys (*Macaca mulatta*) were  
676 implanted bilaterally with custom acute recording chambers (Grey Matter Research LLC, Bozeman, MT).  
677 Partial craniotomies within the chambers allowed access to the arm regions of dorsal premotor (PMd)  
678 and primary motor (M1) cortices in both hemispheres. Localization of target areas was performed using  
679 stereotactically aligned structural MRI collected just prior to implantation, alongside a neuroanatomical  
680 atlas of the rhesus brain (Paxinos et al, 2000).

681

#### 682 Electrophysiology

683 Unit activity was collected using 24-32 channel multi-site probes (V-probe - Plexon Inc, Dallas, TX), with  
684 contacts separated by 100um and positioned axially along a single shank. Probes were lowered deep  
685 enough to cover roughly the full laminar structure of cortex (Figure 2B-C). The depth of insertion was  
686 determined by (1) measurements of the dural surface prior to recording, and (2) presence of spiking  
687 activity across all channels. 2 probes were typically inserted in each hemisphere daily and removed at  
688 the end of the session, one in PMd and one in M1. A total of 12 insertion points across PMd and M1 of  
689 each hemisphere were used across 13 recording sessions in Monkey O, and 6 insertion points across 7  
690 sessions for Monkey W (Figure 2A).

691 Neural data were recorded using the OmniPlex Neural Recording Data Acquisition System (Plexon Inc,  
692 Dallas, TX). Spike sorting was performed offline (Offline Sorter – Plexon Inc, Dallas, TX). Single-unit  
693 waveforms were isolated in multi-dimensional feature space (including principal components, non-linear  
694 energy, waveform amplitudes) and rejected if either (1) the waveform clusters were not stable over the  
695 course of the session, or (2) >0.4% of inter-spike-intervals were below 1ms. For population level  
696 analyses (PCA, LDA), a small number of multi-units were included. A multi-unit was defined by waveform  
697 clusters that separated from the noise cluster and were stable over time, but did not quite meet the

698 inter-spike-interval criteria or contained what might be multiple unit clusters that could not be easily  
699 separated. For monkey O, the average proportion of multi-units in each single session population  
700 sample was 17%, ranging 12-25%. For monkey W, average 20%, ranging 12-32%.

701 Spiking data were binned in 20ms non-overlapping bins, square-root transformed to stabilize variance,  
702 and smoothed with a 50ms gaussian kernel for all analyses (Yu et al., 2009).

703

#### 704 Modulation and Arm Preference metrics

705 Modulation was calculated as:

$$706 \quad M = \left( \frac{x_t - \mu_{rest}}{\sigma_{rest} + 1} \right)^2,$$

707 where

708  $x_t$  : instantaneous firing rate

709  $\mu_{rest}$  : mean firing rate during Rest

710  $\sigma_{rest}$  : standard deviation during Rest

711 This unitless metric reflects the deviation from baseline activity, normalized by baseline fluctuations. It  
712 may be thought of as a signal-to-noise ratio and is similar in form to variance when the mean is taken  
713 over a time window. The constant 1 was added to the denominator for soft-normalization to ensure that  
714 units which were silent during rest did not have exploding values and were not overly emphasized in the  
715 dataset. Because some units had slightly different activity on left and right arm trials even before  
716 instruction, the standard deviation during Rest was calculated separately for each arm and  $\sigma_{rest}$  was  
717 calculated as the mean of the two.

718 Arm Preference was calculated as:

719

$$720 \quad AP = \frac{M_{contra} - M_{ipsi}}{M_{contra} + M_{ipsi}}$$

721 An arm preference of 1 corresponds to a unit that is exclusively modulated during contralateral trials,  
722 while an arm preference of -1 is the same for ipsilateral trials. Arm preferences were independently  
723 assigned for each phase of the task. In analyses that used arm preference along with other features,  
724 independent datasets were used to calculate each to avoid any mathematical coupling, since  
725 modulation itself is used in the arm preference calculation. Note also that the scaling factor used in the  
726 modulation calculation cancels out of the arm preference calculation, making it invariant to the choice  
727 of normalization.

728

#### 729 Principal components analysis

730 Principal components analysis (PCA) was used to identify low-dimensional representations of population  
731 activity with the *pca* function in MATLAB. PCA computes an orthogonal basis set that reflects the  
732 principal axes of variation in the data. Individual components do not strictly correspond to observed  
733 activity patterns, and one should be wary of interpreting them as such, yet the low-dimensional space  
734 spanned by the top few components has been repeatedly used in systems neuroscience as a helpful



735 descriptor of coordinated ensemble activity (Cunningham and Yu, 2014). PCA was selected over other  
736 dimensionality reduction techniques for its widespread use and relative lack of assumptions.

737 Prior to fitting the models, firing rate data were soft-normalized using the same method as in the  
738 modulation strength calculation:

$$739 \quad z_t = \frac{x_t - \mu_{rest}}{\sigma_{rest} + 1}$$

740 An alternative normalization factor was used to create Figure S2, replacing the denominator by the full  
741 firing rate range + 5Hz (Elsayed et al., 2016; Ames and Churchland, 2019; Heming et al., 2019). Since Rest  
742 phase mean activity was already subtracted from individual units, we did not de-mean again prior to  
743 computing PCA models. Measures of variance accounted for were not inflated by capturing means  
744 because they were computed using the variance of the component scores (Figure 7,8F):

$$745 \quad V = Tr(Cov(XP))$$

746 Where  $X$  is a  $t \times n$  data matrix and  $P$  is an  $n \times p$  projection matrix, given  $t$  time samples,  $n$  units, and  $p$   
747 principal component dimensions.

748 Cross-validation approaches were used for all analyses and figures to address overfitting. This provided  
749 accurate and generalizable estimates of variance capturing metrics that could also be appropriately  
750 compared across datasets (i.e. across time or arms).

751

#### 752 Dimensionality estimation

753 Dimensionality of the PCA subspace was estimated by optimizing the cross-validated reconstruction of  
754 full-dimensional neural data from component scores. Given  $m$  trials and  $n$  units, the following procedure  
755 was used:

756 **1.** Leave out the  $i^{\text{th}}$  trial from the data matrix, yielding training data,  $X^{(-i)}$ , and testing data,  $X^{(i)}$

757 **2.** Train PCA model of dimension  $p < n$  on  $X^{(-i)}$ , using singular value decomposition (SVD) to compute  
758 the projection matrix,  $P^{(-i)}$

759 **3.** Leave out the  $j^{\text{th}}$  unit from the testing data and projection matrix by removing the  $j^{\text{th}}$  column and row  
760 from each, respectively, yielding  $X_{-j}^{(i)}$  and  $P_{-j}^{(-i)}$

761 **4.** Using the Moore-Penrose pseudoinverse, find a new projection matrix with the  $j^{\text{th}}$  unit removed,  
762 whose transpose is  $(P_{-j}^{(-i)})^+$

763 **5.** Calculate the component score for the  $i^{\text{th}}$  trial using the remaining units and the new projection  
764 matrix, then estimate the  $j^{\text{th}}$  unit from that component score by projecting back into the ambient space.  
765 As a single step, this calculation is:

$$766 \quad \hat{X}_j^{(i)} = \left[ P^{(-i)} (P_{-j}^{(-i)})^+ (X_{-j}^{(i)})^T \right]_j$$

767 **7.** Repeat for trials  $i=1, \dots, m$  and units  $j=1, \dots, n$

768 **8.** Repeat for component numbers  $p=1, \dots, n$ . Take the number of components that minimizes the  
769 predicted residual error sum of squares (PRESS) statistic:

$$770 \quad PRESS = \sum_{i=1}^m \sum_{j=1}^n \left( X_j^{(i)} - \hat{X}_j^{(i)} \right)^2$$

771 This method provides estimates of the full-dimensional neural data, independent of the training set, by  
772 identifying consistent population structure. Similar methods have been used previously for assessing  
773 dimensionality reduction techniques for neural data (Yu et al., 2009). There are no mathematical  
774 constraints favoring increased dimensionality. As such, the dimensionality estimate is conservative and  
775 robust to overfitting. Using heuristics, such as the number of components to explain 90% variance,  
776 would be inappropriate for our analyses. They are prone to overfitting, which would include  
777 meaningless components and impair analysis of model structure via coefficient weights.

778

### 779 Covariance alignment

780 We computed a measure of similarity between pairs of subspaces that we call Covariance Alignment.  
781 Our method is essentially the same as that previously used for comparing low-dimensional spaces via  
782 factor analysis (Athalye et al., 2017). In short, this measure computes the proportion of low-dimensional  
783 variance from one dataset that is also captured in the low-dimensional space of another dataset.

784 Given  $t \times n$  data matrices  $X_A, X_B$ , where  $n$  is the number of units and  $t$  is the number of time samples,  
785 the following procedure was used:

786 **1.** Train PCA models of dimension  $p < n$  on  $X_A$  and  $X_B$ , using SVD to compute the  $n \times p$  projection  
787 matrices,  $P_A$  and  $P_B$

788 **2.** Project  $X_A$  into its own  $p$ -dimensional space and compute the variance as:

$$789 \quad V_A = \text{Tr}(\text{Cov}(X_A P_A)) = \text{Tr}(\text{Cov}(T_A))$$

790 **3.** Project the  $p$ -dimensional representation of  $X_A$ , which is  $T_A$ , into the  $p$ -dimensional space identified  
791 using  $X_B$  and compute the variance as:

$$792 \quad V_{A \text{ in } B} = \text{Tr}(\text{Cov}(X_A P_A P_A^T P_B)) = \text{Tr}(\text{Cov}(T_A P_A^T P_B))$$

793 **4.** Return the proportion of  $p$ -dimensional variance from dataset  $A$  that is also captured in dataset  $B$ 's  
794 subspace using the ratio:

$$795 \quad CA = \frac{V_{A \text{ in } B}}{V_A} = \frac{\text{Tr}(\text{Cov}(X_A P_A P_A^T P_B))}{\text{Tr}(\text{Cov}(X_A P_A))} = \frac{\text{Tr}(\text{Cov}(T_A P_A^T P_B))}{\text{Tr}(\text{Cov}(T_A))}$$

796 This metric is subtly different from the alignment indices used in Elsayed et al., 2016 and Heming, Cross  
797 et al., 2019. The key difference here is the double projection in the numerator, which means that we are  
798 specifically capturing the proportion of low-dimensional variance from one dataset that is captured in  
799 the low-dimensional space of another, rather than the ratio of overall variance captured in two different  
800 subspaces.

801

802 PCA coefficient analysis

803 Since components of PCA models form an orthogonal basis set, each was independently analyzed to  
804 determine its contribution to subspace divergence. Two statistics were calculated for each component  
805 using held-out datasets.

806 First, we projected activity during trials of each arm onto a single component, calculated the variance of  
807 the projections for each arm, and expressed them as a ratio. This captured each component's  
808 contribution to discrimination between the arms. For component  $C$ , this calculation is:

$$809 \quad V_{C,R/L} = \frac{\text{Var}(X_R P_C)}{\text{Var}(X_L P_C)}$$

810 Where  $X_R, X_L$  are  $t \times n$  data matrices for the right and left arms, respectively, and  $P_C$  is the  $n \times 1$   
811 projection matrix for component  $C$ . The log of this ratio will be far from 0 if there is much more variance  
812 for one arm than the other along the axis defined by  $P_C$ .

813 Second, we calculated a coefficient-weighted average of the arm preferences for all units. If non-zero  
814 weights were only given to right arm dedicated units, this value would be 1; if weights were evenly  
815 distributed across the spectrum of arm-preferences, this value would be 0. Therefore, this measure  
816 captured the dependence of a given component on arm-dedicated units. The coefficient-weighted arm  
817 preference,  $CAP$ , for component  $C$  was calculated as

$$818 \quad CAP_C = \frac{A |P_C|}{\sum_{i=1}^n |P_{C,i}|}$$

819 Where  $A$  is the  $1 \times n$  vector of arm preferences for each unit.

820

821 Linear discriminant analysis

822 Population coding of movement was analyzed using Linear Discriminant Analysis (LDA) with the *fitdiscr*  
823 function in MATLAB. LDA assumes that each class (target x limb combination) is associated with a  
824 multivariate normal distribution over the predictor variables (spiking activity of multiple units) having  
825 identical covariance but different means. Uniform priors were enforced for all models. As it was  
826 expected that the covariance may change across use of the two arms during reaching, LDA models were  
827 trained separately for each limb to allow fitting of arm-specific covariance matrices. LDA was chosen for  
828 its robustness to violations of the given assumptions and its history of success with neural data  
829 (Diedrichsen et al., 2013; Rich and Wallis, 2016).

830

831 Fine timescale analysis of population coding and subspace development (heatmaps)

832 The same basic method was used for displaying fine timescale changes in population coding of  
833 movements (via LDA) and covariance structure (via PCA, Covariance Alignment). Neural data were  
834 organized as 3D tensors (units, time windows, trials). Comparisons were made between all possible pairs  
835 of time windows, using fully independent trial sets to prevent overfitting. For LDA models, this consisted  
836 of leave-one-out cross-validation; for Covariance Alignment, random partitioning into two datasets of  
837 equal trial numbers. Averages of the cross-validated results provided the 2D matrices visualized using  
838 heatmaps in Figure 6B-C and Figure 8C-D. A single row or column therefore reflects the similarity of

839 population coding or covariance between a single timepoint and all other timepoints across the trial.

840 Block diagonal structure in the heatmaps reveals locally consistent structure within task phases.

841

842 Permutation testing procedures

843 Permutation tests were used for both single and multi-factorial hypothesis testing when parametric  
844 tests were inappropriate. Null distributions were constructed by constraining permutations to only data  
845 that were exchangeable under the null hypothesis (Anderson and Braak, 2002). For example, we  
846 maintained the crossed structure of Phase (Rest, Instruct, Move), by only permuting Phase labels within  
847 units. 10,000 permutations were used for all analyses, and p-values were estimated as the proportion of  
848 permutations resulting in test statistics that were at least as extreme as what was observed. In cases  
849 where the observed test statistic was more extreme than any permutations, we assigned a p-value of  
850  $1/\text{number of permutations} = 1.0e-4$ .

851

852 **SUPPLEMENTARY FIGURES**

853

|     | Number SU's | Significantly modulated |          |          |         |          |         |
|-----|-------------|-------------------------|----------|----------|---------|----------|---------|
|     |             | Instruct                |          |          | Move    |          |         |
|     |             | Ipsi                    | Bi       | Contra   | Ipsi    | Bi       | Contra  |
| PMd | 433         | 68(16%)                 | 154(36%) | 105(24%) | 52(12%) | 245(57%) | 94(22%) |
|     | 113         | 11(10%)                 | 31(27%)  | 26(23%)  | 19(17%) | 42(37%)  | 21(19%) |
| M1  | 331         | 57(17%)                 | 95(29%)  | 61(18%)  | 47(14%) | 194(59%) | 60(18%) |
|     | 289         | 39(13%)                 | 35(12%)  | 59(20%)  | 22(8%)  | 110(38%) | 87(30%) |

854

855 **Table S1. Proportions of significantly modulated single-units across task phases.**

856 For well isolated single-units in each brain area, the proportions of the total population that were  
 857 significantly modulated when compared with the Rest phase (two-sample t-test,  $p < 0.05$ ). For each  
 858 phase, single-units were classified as uniquely ipsi, contra, or bilaterally modulated. Top row in each pair  
 859 of rows represents Monkey O, bottom row Monkey W.

860

861

862

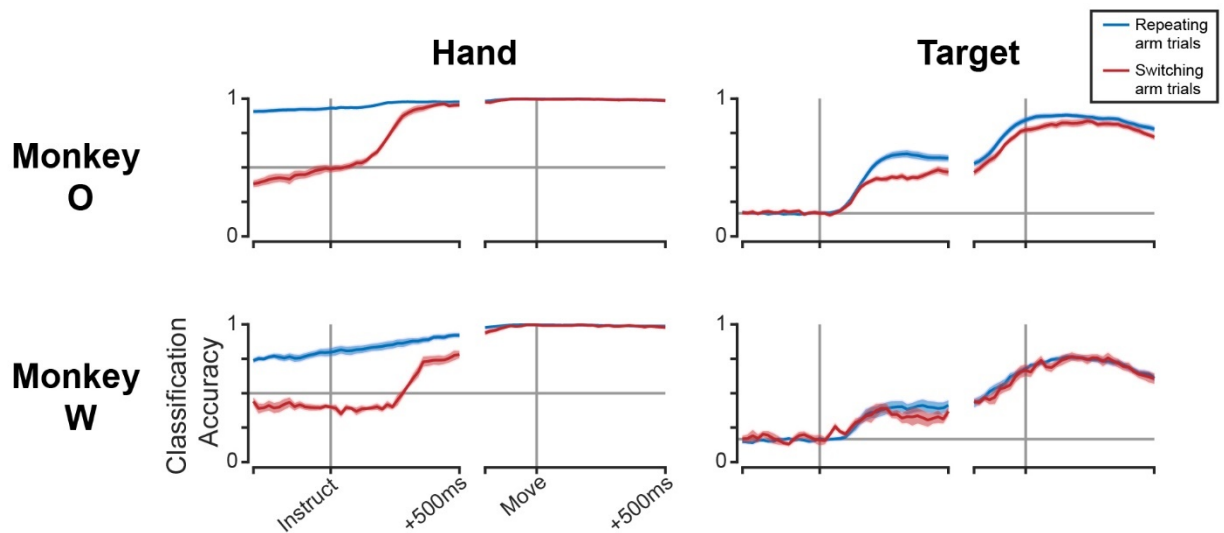

863

864 **Figure S1. Arm-specific neural patterns exist during Rest on predictable trials.**

865 Cross-validated classification accuracy for hand (left column) and target (right column) assignments. LDA  
 866 models were trained on only trials that required use of the same arm as the previous trial, then tested  
 867 on either held-out repeating arm trials (blue lines) or switching arm trials (red lines). Separate models  
 868 were used for each timepoint. Horizontal grey lines indicate chance level. 13 Sessions for monkey O (top  
 869 row); 7 sessions for monkey W (bottom row). Mean +/- standard error across sessions.

870

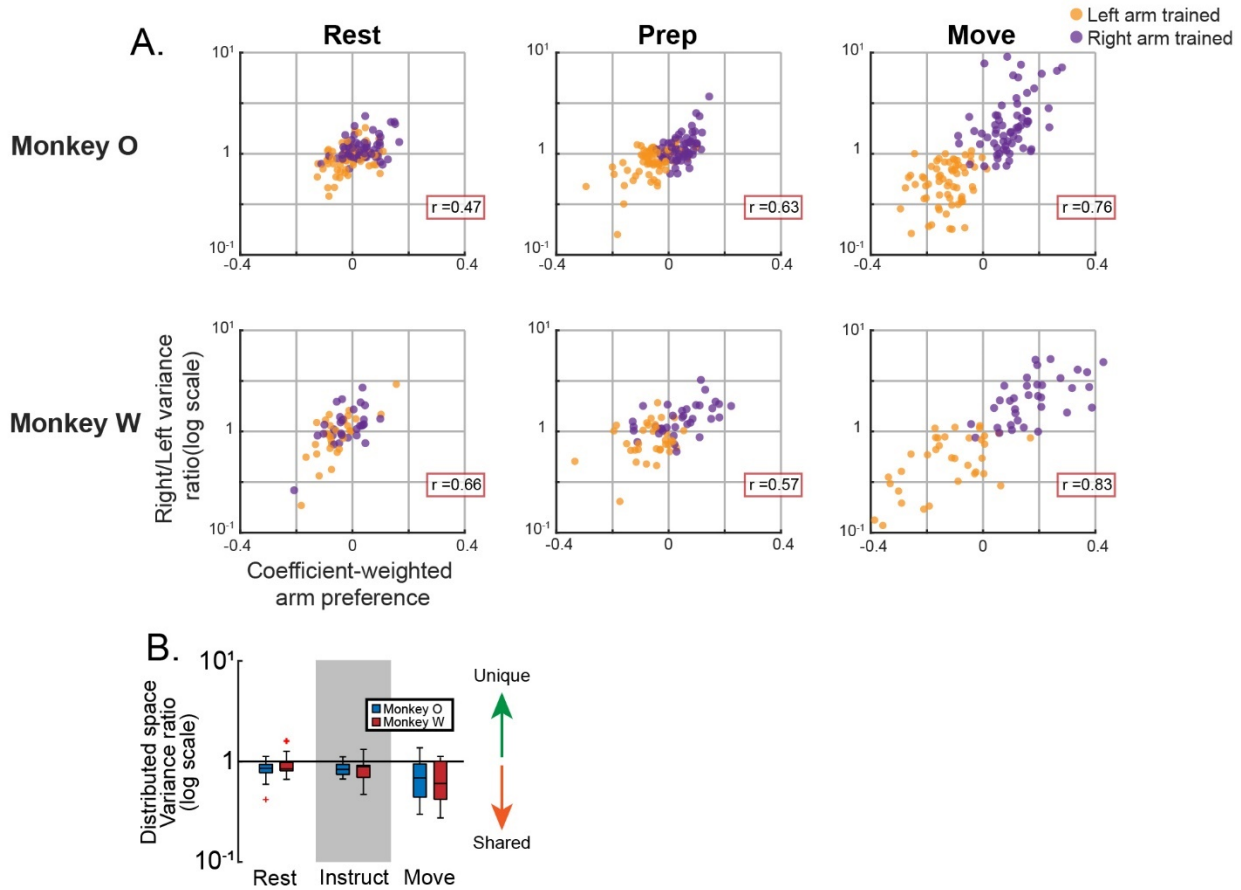

871

872 **Figure S2. Subspace results using alternative firing rate normalization.**

873 Prior to performing PCA, an alternative method of normalizing firing rates was used for these plots.

874 Rather than dividing by the standard deviation at Rest, each unit's firing rate trace was divided by the

875 full firing rate range + 5Hz (Elsayed et al., 2016; Ames and Churchland, 2019; Heming et al., 2019). This

876 will mitigate the effect of highly modulated units, which PCA will preferentially represent otherwise. (A)

877 Repetition of Figure 7D. (B) Repetition of Figure 8F.

878

879 **ACKNOWLEDGEMENTS**

880 We thank M. Kitano for help in NHP care and handling, and A. You, W. Liberti and Z. Balewski for helpful  
881 discussions. This work was supported by the National Defense Science and Engineering Graduate  
882 Fellowship to T.C.D, and a grant from the National Institute of Health (NS097480) to J.M.C.

883

884 **COMPETING INTERESTS**

885 We declare no competing interests.

886

887 **AUTHOR CONTRIBUTIONS**

888 T.C.D., C.M.M., R.B.I., and J.M.C. conceived and designed the experiments. T.C.D. performed the  
889 experiments, analyzed the data, and wrote the manuscript. T.C.D., C.M.M., J.D.W., R.B.I., and J.M.C  
890 reviewed and edited the manuscript.

891

892 **REFERENCES**

- 893 1. Alagona G, Delvaux V, Gérard P, De Pasqua V, Pennisi G, Delwaide PJ, Nicoletti F, Maertens De  
894 Noordhout A. 2001. Ipsilateral motor responses to focal transcranial magnetic stimulation in  
895 healthy subjects and acute-stroke patients. *Stroke*, 32(6), 1304–1309.  
896 <https://doi.org/10.1161/01.STR.32.6.1304>
- 897 2. Ames KC, Churchland MM. 2019. Motor cortex signals for each arm are mixed across  
898 hemispheres and neurons yet partitioned within the population response. *eLife*, 8, 1–36.  
899 <https://doi.org/10.7554/eLife.46159>
- 900 3. Anderson M, ter Braak CJF. 2002. Permutation tests for multi-factorial analysis of variance.  
901 *Journal of Statistical Computation and Simulation*, 73(2), 85–113.
- 902 4. Athalye VR, Costa RM, Ganguly K, Costa RM, Carmena JM. 2017. Emergence of Coordinated  
903 Neural Dynamics Underlies Neuroprosthetic Learning and Skillful Control. *Neuron*, 93(4), 955-  
904 970.e5. <https://doi.org/10.1016/j.neuron.2017.01.016>
- 905 5. Baker SN, Zaaimi B, Fisher KM, Edgley SA, Soteropoulos DS. 2015. Pathways mediating functional  
906 recovery. *Progress in Brain Research* (1st ed., Vol. 218). Elsevier B.V.  
907 <https://doi.org/10.1016/bs.pbr.2014.12.010>
- 908 6. Bernstein NA. 1967. The Co-ordination and Regulation of Movements. Pergamon Press, Oxford.
- 909 7. Brinkman C. 1981. Lesions in supplementary motor area interfere with a monkey's performance  
910 of a bimanual coordination task. *Neuroscience Letters*, 27(3), 267–270.  
911 [https://doi.org/10.1016/0304-3940\(81\)90441-9](https://doi.org/10.1016/0304-3940(81)90441-9)
- 912 8. Brinkman J, Kuypers HGJM. 1973. Cerebral control of contralateral and ipsilateral arm, hand and  
913 finger movements in the split brain rhesus monkey. *Brain*, 93, 653–674. PubMed: 4204228
- 914 9. Buford, J. A., & Davidson, A. G. (2004). Movement-related and preparatory activity in the  
915 reticulospinal system of the monkey. *Experimental Brain Research*, 159(3), 284–300.  
916 <https://doi.org/10.1007/s00221-004-1956-4>

- 917 10. Calabrese E, Badea A, Coe CL, Lubach GR, Shi Y, Styner MA, Johnson A. 2015. A diffusion tensor  
918 MRI atlas of the postmortem rhesus macaque brain. *Neuroimage* 117:408–416.  
919 <https://doi.org/10.1016/j.neuroimage.2015.05.072>
- 920 11. Carmena JM, Lebedev MA, Crist RE, O’Doherty JE, Santucci DM, Dimitrov DF, Patil PG, Henriquez  
921 CS, Nicolelis MAL. 2003. Learning to control a brain-machine interface for reaching and grasping  
922 by primates. *PLoS Biology*, 1(2), 193–208. <https://doi.org/10.1371/journal.pbio.0000042>
- 923 12. Chen R, Yung D, Li JY. 2003. Organization of ipsilateral excitatory and inhibitory pathways in the  
924 human motor cortex. *Journal of Neurophysiology*, 89(3), 1256–1264.  
925 <https://doi.org/10.1152/jn.00950.2002>
- 926 13. Churchland MM, Yu BM, Ryu SI, Santhanam G, Shenoy KV. 2006. Neural Variability in Premotor  
927 Cortex Provides a Signature of Motor Preparation. *Journal of Neuroscience*, 26(14), 3697–3712.  
928 <https://doi.org/10.1523/JNEUROSCI.3762-05.2006>
- 929 14. Churchland MM, Cunningham JP, Kaufman MT, Ryu SI, Shenoy KV. 2010. Cortical Preparatory  
930 Activity: Representation of Movement or First Cog in a Dynamical Machine? *Neuron*, 68(3), 387–  
931 400. <https://doi.org/10.1016/j.neuron.2010.09.015>
- 932 15. Churchland MM, Cunningham JP, Kaufman MT, Foster JD, Nuyujukian P, Ryu SI, Shenoy KV.  
933 2012. Neural Population Dynamics During Reaching. *Nature*, 487(7405), 1–20.  
934 <https://doi.org/10.1016/j.micinf.2011.07.011.Innate>
- 935 16. Cisek P, Crammond DJ, Kalaska JF. 2003. Neural activity in primary motor and dorsal premotor  
936 cortex in reaching tasks with the contralateral versus ipsilateral arm. *J Neurophysiol*, 89(2), 922-  
937 942.
- 938 17. Cunningham JP, Yu BM. 2014. Dimensionality reduction for large-scale neural recordings. *Nature*  
939 *Neuroscience*, 17(11), 1500–1509. <https://doi.org/10.1038/nn.3776>
- 940 18. Dancause N. 2006. Vicarious function of remote cortex following stroke: Recent evidence from  
941 human and animal studies. *Neuroscientist*, 12(6), 489–499.  
942 <https://doi.org/10.1177/1073858406292782>
- 943 19. Diedrichsen J, Shadmehr R, Ivry RB. 2010. The coordination of movement: optimal feedback  
944 control and beyond. *Trends in Cognitive Sciences*, 14(1), 31–39.  
945 <https://doi.org/10.1016/j.tics.2009.11.004>
- 946 20. Diedrichsen J, Wiestler T, Krakauer JW. 2013. Two distinct ipsilateral cortical representations for  
947 individuated finger movements. *Cerebral Cortex*, 23(6), 1362–1377.  
948 <https://doi.org/10.1093/cercor/bhs120>
- 949 21. Donchin O, Gribova A, Steinberg O, Bergman H, Vaadia E. 1998. Primary motor cortex is involved  
950 in bimanual coordination. *Nature*, 395(6699), 274–278.
- 951 22. Dum R, Strick P. 2002. Motor Areas in the Frontal Lobe, 77, 677–682.  
952 <https://doi.org/10.1201/9780203503584.sec1>
- 953 23. Duque J, Lew D, Mazzocchio R, Olivier E, Ivry RB. 2010. Evidence for Two Concurrent Inhibitory  
954 Mechanisms during Response Preparation. *Journal of Neuroscience*, 30(10), 3793–3802.  
955 <https://doi.org/10.1523/JNEUROSCI.5722-09.2010>
- 956 24. Elsayed GF, Lara AH, Kaufman MT, Churchland MM, Cunningham JP. 2016. Reorganization  
957 between preparatory and movement population responses in motor cortex. *Nature*  
958 *Communications*, 13239. <https://doi.org/10.1038/ncomms13239>
- 959 25. Fetz EE, Perlmutter SI, Prut Y, Seki K, Votaw S. 2002. Roles of primate spinal interneurons in  
960 preparation and execution of voluntary hand movement. *Brain Research Reviews*, 40(1–3), 53–  
961 65. [https://doi.org/10.1016/S0165-0173\(02\)00188-1](https://doi.org/10.1016/S0165-0173(02)00188-1)
- 962 26. Franz EA, Eliassen JC, Ivry RB, Gazzaniga MS. 1996. Dissociation of spatial and temporal coupling  
963 in the bimanual movements of callosotomy patients. *Psychological Science*, 16(2), 60–61.  
964 <https://doi.org/10.1111/j.1467-9639.1994.tb00691.x>



- 965 27. Ganguly K, Secundo L, Ranade G, Orsborn A, Chang EF, Dimitrov DF, Wallis JD, Barbaro NM,  
966 Knight RT, Carmena JM. 2009. Cortical representation of ipsilateral arm movements in monkey  
967 and man, 27(52), 14299–14307. <https://doi.org/10.1523/JNEUROSCI.3593-07.2007>.Omega-3  
968 28. Gazzaniga MS. 1989. Organization of the human brain. *Science*, 245(4921), 947 LP – 952.  
969 <https://doi.org/10.1126/science.2672334>  
970 29. Hatem SM, Saussez G, della Faille M, Prist V, Zhang X, Dispa D, Bleyenheuft Y. 2016.  
971 Rehabilitation of motor function after stroke: A multiple systematic review focused on  
972 techniques to stimulate upper extremity recovery. *Frontiers in Human Neuroscience*,  
973 10(SEP2016), 1–22. <https://doi.org/10.3389/fnhum.2016.00442>  
974 30. Heming EA, Cross KP, Takei T, Cook DJ, Scott SH. 2019. Independent representations of  
975 ipsilateral and contralateral limbs in primary motor cortex. *ELife*, 8(2002), 1–26.  
976 <https://doi.org/10.7554/eLife.48190>  
977 31. Hoshi E, Tanji J. 2002. Contrasting neuronal activity in the dorsal and ventral premotor areas  
978 during preparation to reach. *Journal of Neurophysiology*, 87(2), 1123–1128.  
979 <https://doi.org/10.1152/jn.00496.2001>  
980 32. Hummel, F. C., & Cohen, L. G. (2006). Non-invasive brain stimulation: a new strategy to improve  
981 neurorehabilitation after stroke? *The Lancet Neurology*, 5(8), 708–712.  
982 33. Jankowska E, Cabaj A, Pettersson, LG. 2005. How to enhance ipsilateral actions of pyramidal  
983 tract neurons. *Journal of Neuroscience*, 25(32), 7401–7405.  
984 <https://doi.org/10.1523/JNEUROSCI.1838-05.2005>  
985 34. Kaufman MT, Churchland MM, Ryu SI, Shenoy KV. 2014. Cortical activity in the null space:  
986 Permitting preparation without movement. *Nature Neuroscience*, 17(3), 440–448.  
987 <https://doi.org/10.1038/nn.3643>  
988 35. Kaufman MT, Seely JS, Sussillo D, Ryu SI, Shenoy KV, Churchland MM. 2016. The largest  
989 response component in the motor cortex reflects movement timing but not movement type.  
990 *ENeuro*, 3(4). <https://doi.org/10.1523/ENEURO.0085-16.2016>  
991 36. Kazennikov O, Hyland B, Corboz M, Babalian A, Rouiller EM, Wiesendanger M. 1999. Neural  
992 activity of supplementary and primary motor areas in monkeys and its relation to bimanual and  
993 unimanual movement sequences. *Neuroscience*, 89(3), 661–674.  
994 [https://doi.org/10.1016/S0306-4522\(98\)00348-0](https://doi.org/10.1016/S0306-4522(98)00348-0)  
995 37. Keizer K, Kuypers HGJM. 1989. Distribution of corticospinal neurons with collaterals to the lower  
996 brain stem reticular formation in monkey (*Macaca fascicularis*). *Experimental Brain Research*,  
997 311–318.  
998 38. Kennerley SW, Diedrichsen J, Hazeltine E, Semjen A, Ivry RB. 2002. Callosotomy patients exhibit  
999 temporal uncoupling during continuous bimanual movements. *Nature Neuroscience*, 5(4), 376–  
1000 381. <https://doi.org/10.1038/nn822>  
1001 39. Lacroix S, Havton LA, McKay H, Yang H, Brant A, Roberts J, Tuszynski MH. 2004. Bilateral  
1002 Corticospinal Projections Arise from Each Motor Cortex in the Macaque Monkey: A Quantitative  
1003 Study. *Journal of Comparative Neurology*, 473(2), 147–161. <https://doi.org/10.1002/cne.20051>  
1004 40. Lashley KS. 1933. Integrative functions of the cerebral cortex. *Physiol. Rev.*, 13: 1–42.  
1005 41. Lawrence DG, Kuypers HGJM. 1968. The Functional Organization of the Motor System in the  
1006 Monkey. *Brain*, 91(1), 15–36. <https://doi.org/10.1093/brain/91.1.15>  
1007 42. Li N, Chen T, Guo ZV, Gerfen CR, Svoboda K. 2015. A motor cortex circuit for motor planning and  
1008 movement. *Nature*, 519(7541), 51–56. <https://doi.org/10.1038/nature14178>  
1009 43. Li N, Daie K, Svoboda K, Druckmann S. 2016. Robust neuronal dynamics in premotor cortex  
1010 during motor planning. *Nature*, 537(7618), 122. <https://doi.org/10.1038/nature18623>

- 1011 44. Matsunami K, Hamada I. 1981. Characteristics of the ipsilateral movement-related neuron in the  
1012 motor cortex of the monkey. *Brain Research*, 204(1), 29–42. [https://doi.org/10.1016/0006-](https://doi.org/10.1016/0006-8993(81)90649-1)  
1013 [8993\(81\)90649-1](https://doi.org/10.1016/0006-8993(81)90649-1)
- 1014 45. Maxwell DJ, Soteropoulos DS. 2019. The mammalian spinal commissural system: properties and  
1015 functions. *Journal of Neurophysiology*, 123(1), 4–21. <https://doi.org/10.1152/jn.00347.2019>
- 1016 46. McMillan S, Ivry RB, Byblow WD. 2006. Corticomotor excitability during a choice-hand reaction  
1017 time task. *Exp Brain Res*, 172(2), 230-245.
- 1018 47. Montgomery LR, Herbert WJ, Buford JA. 2013. Recruitment of ipsilateral and contralateral upper  
1019 limb muscles following stimulation of the cortical motor areas in the monkey. *Experimental*  
1020 *Brain Research*, 230(2), 153–164. <https://doi.org/10.1007/s00221-013-3639-5>
- 1021 48. Noskin O, Krakauer JW, Lazar RM, Festa JR, Handy C, O'Brien KA, Marshall RS. 2008. Ipsilateral  
1022 motor dysfunction from unilateral stroke: implications for the functional neuroanatomy of  
1023 hemiparesis. *J Neurol Neurosurg Psychiatry*, 79(4), 401-406.
- 1024 49. Papaioannou S, Dimitriou M. 2020. Goal-dependent tuning of muscle spindle receptors during  
1025 movement preparation. *bioRxiv*. <https://doi.org/10.1101/2020.03.06.981530>
- 1026 50. Paxinos G, Huang XF, Toga AW. 2000. The Rhesus Monkey Brain in Stereotaxic Coordinates.  
1027 Academic Press.
- 1028 51. Penfield W, Boldrey E. 1937. Somatic motor and sensory representation in the cerebral cortex of  
1029 man as studied by electrical stimulation. *Brain*, 389–443.  
1030 <https://doi.org/10.1093/brain/60.4.389>
- 1031 52. Pruszynski JA, Kurtze I, Nashed JY, Omrani M, Brouwer B, Scott SH. 2011. Primary motor cortex  
1032 underlies multi-joint integration for fast feedback control. *Nature*, 478(7369), 387–390.  
1033 <https://doi.org/10.1038/nature10436>
- 1034 53. Rich E, Wallis JD. 2016. Decoding subjective decisions from orbitofrontal cortex supplementary.  
1035 *Nature Neuroscience*, 19(7), 973–980. <https://doi.org/10.1038/nn.4320>
- 1036 54. Rosenzweig ES, Brock JH, Culbertson MD, Lu P, Moseanko R, Edgerton VR, Havton LA, Tuszynski  
1037 MH. 2009. Extensive spinal decussation and bilateral termination of cervical corticospinal  
1038 projections in rhesus monkeys. *J Comp Neurol*, 513(2), 151-163.
- 1039 55. Scholz, J. P., & Schöner, G. (1999). The uncontrolled manifold concept: Identifying control  
1040 variables for a functional task. *Experimental Brain Research*, 126(3), 289–306.  
1041 <https://doi.org/10.1007/s002210050738>
- 1042 56. Scott, S. H. (2003). The role of primary motor cortex in goal-directed movements: Insights from  
1043 neurophysiological studies on non-human primates. *Current Opinion in Neurobiology*, 13(6),  
1044 671–677. <https://doi.org/10.1016/j.conb.2003.10.012>
- 1045 57. Shen L, Alexander GE. 1997. Preferential representation of instructed target location versus limb  
1046 trajectory in dorsal premotor area. *Journal of Neurophysiology*, 77(3), 1195–1212.  
1047 <https://doi.org/10.1152/jn.1997.77.3.1195>
- 1048 58. Shenoy KV, Sahani M, Churchland, MM. 2013. Cortical Control of Arm Movements: A Dynamical  
1049 Systems Perspective. *Annual Review of Neuroscience*, 36(1), 337–359.  
1050 <https://doi.org/10.1146/annurev-neuro-062111-150509>
- 1051 59. Soteropoulos DS, Edgley SA, Baker, SN. 2011. Lack of evidence for direct corticospinal  
1052 contributions to control of the ipsilateral forelimb in monkey. *Journal of Neuroscience*, 31(31),  
1053 11208–11219. <https://doi.org/10.1523/JNEUROSCI.0257-11.2011>
- 1054 60. Sussillo D, Churchland MM, Kaufman MT, Shenoy KV. 2015. A neural network that finds a  
1055 naturalistic solution for the production of muscle activity. *Nat Neurosci*, 116(8), 1477–1490.  
1056 doi:10.1038/nn.4042

- 1057 61. Swinnen, S. P., & Wenderoth, N. (2004). Two hands, one brain: Cognitive neuroscience of  
1058 bimanual skill. *Trends in Cognitive Sciences*, 8(1), 18–25.  
1059 <https://doi.org/10.1016/j.tics.2003.10.017>
- 1060 62. Tanji J, Okano K, Sato KC. 1988. Neuronal activity in cortical motor areas related to ipsilateral,  
1061 contralateral, and bilateral digit movements of the monkey. *Journal of Neurophysiology*, 60(1),  
1062 325–343. <https://doi.org/10.1152/jn.1988.60.1.325>
- 1063 63. Verstynen T, Diedrichsen J, Albert N, Aparicio P, Ivry RB. 2005. Ipsilateral motor cortex activity  
1064 during unimanual hand movements relates to task complexity. *J Neurophysiol*, 93(3), 1209–1222.
- 1065 64. Verstynen T, Ivry RB. 2011. Network dynamics mediating ipsilateral motor cortex activity during  
1066 unimanual actions. *Journal of Cognitive Neuroscience*, 23(9), 2468–2480.  
1067 <https://doi.org/10.1162/jocn.2011.21612>
- 1068 65. Weinrich M, Wise SP, Mauritz KH. 1984. A neurophysiological study of the premotor cortex in  
1069 the rhesus monkey. *Brain*, 107(2), 385–414. <https://doi.org/10.1093/brain/107.2.385>
- 1070 66. Welford AT. 1968. Fundamentals of Skill. Methuen, London.
- 1071 67. Wiesendanger, M., & Serrien, D. J. (2004). The quest to understand bimanual coordination.  
1072 *Progress in Brain Research*, 143(03), 491–505. [https://doi.org/10.1016/S0079-6123\(03\)43046-X](https://doi.org/10.1016/S0079-6123(03)43046-X)
- 1073 68. Wilkins KB, Yao J, Owen M, Karbasforoushan H, Carmona C, Dewald, JPA. 2020. Limited capacity  
1074 for ipsilateral secondary motor areas to support hand function post-stroke. *Journal of*  
1075 *Physiology*, 598(11), 2153–2167. <https://doi.org/10.1113/JP279377>
- 1076 69. Yu BM, Cunningham JP, Santhanam G, Ryu SI, Shenoy KV, Sahani M. 2009. Gaussian-process  
1077 factor analysis for low-dimensional single-trial analysis of neural population activity. *Journal of*  
1078 *Neurophysiology*, 102(1), 614–635. <https://doi.org/10.1152/jn.90941.2008>
- 1079 70. Ziemann U, Ishii K, Borgheresi A, Yaseen Z, Battaglia F, Hallett M, Cincotta M, Wassermann EM.  
1080 1999. Dissociation of the pathways mediating ipsilateral and contralateral motor-evoked  
1081 potentials in human hand and arm muscles. *Journal of Physiology*, 518(3), 895–906.  
1082 <https://doi.org/10.1111/j.1469-7793.1999.0895p.x>

1083
